1  
2  
3  
4  
5  
6  
7  
8  
9  
10  
11  
12  
13  
14  
15  
16  
17  
18  
19

## ***In vivo* augmentation of a complex gut bacterial community**

Alice G. Cheng<sup>1\*</sup>, Po-Yi Ho<sup>2\*</sup>, Sunit Jain<sup>3</sup>, Xiandong Meng<sup>3</sup>, Min Wang<sup>2</sup>, Feiqiao Brian Yu<sup>2</sup>, Mikhail Iakiviak<sup>2</sup>, Ariel R. Brumbaugh<sup>2,4</sup>, Kazuki Nagashima<sup>2</sup>, Aishan Zhao<sup>2</sup>, Advait Patil<sup>2</sup>, Katayoon Atabakhsh<sup>2</sup>, Allison Weakley<sup>3</sup>, Jia Yan<sup>3</sup>, Steven Higginbottom<sup>2</sup>, Norma Neff<sup>3</sup>, Justin L. Sonnenburg<sup>3,5</sup>, Kerwyn Casey Huang<sup>2,3,5,6,†</sup>, Michael A. Fischbach<sup>2,3,5,6†</sup>

<sup>1</sup>Department of Gastroenterology, Stanford School of Medicine, Stanford, CA 94305, USA

<sup>2</sup>Department of Bioengineering, Stanford University, Stanford, CA 94305, USA

<sup>3</sup>Chan Zuckerberg Biohub, San Francisco, CA 94158, USA

<sup>4</sup>Present address: Federation Bio, South San Francisco, CA 94080

<sup>5</sup>Department of Microbiology and Immunology, Stanford University School of Medicine, Stanford University, Stanford, CA 94305, USA

<sup>6</sup>ChEM-H Institute, Stanford University, Stanford, CA 94305, USA

\*Equal contribution

†Correspondence: [kchuang@stanford.edu](mailto:kchuang@stanford.edu), [fischbach@fischbachgroup.org](mailto:fischbach@fischbachgroup.org)

Lead author: Michael Fischbach ([fischbach@fischbachgroup.org](mailto:fischbach@fischbachgroup.org))

20 **ABSTRACT**

21        Efforts to model the human gut microbiome in mice have led to important insights into the  
22 mechanisms of host-microbe interactions. However, the model communities studied to date have been  
23 defined or complex but not both, limiting their utility. In accompanying work, we constructed a complex  
24 synthetic community (104 strains, hCom1) containing the most common taxa in the human gut microbiome.  
25 Here, we used an iterative experimental process to improve hCom1 by filling open metabolic and/or  
26 anatomical niches. When we colonized germ-free mice with hCom1 and then challenged it with a human  
27 fecal sample, the consortium exhibited surprising stability; 89% of the cells and 58% of the taxa derive  
28 from the original community, and the pre- and post-challenge communities share a similar overall structure.  
29 We used these data to construct a second version of the community, adding 22 strains that engrafted  
30 following fecal challenge and omitting 7 that dropped out (119 strains, hCom2). In gnotobiotic mice, hCom2  
31 exhibited increased stability to fecal challenge and robust colonization resistance against pathogenic  
32 *Escherichia coli*. Mice colonized by hCom2 versus human feces are similar in terms of microbiota-derived  
33 metabolites, immune cell profile, and bacterial density in the gut, suggesting that this consortium is a  
34 prototype of a model system for the human gut microbiome.

## 35 INTRODUCTION

36 Experiments in which a microbial community is transplanted into germ-free mice have opened the  
37 door to studies of mechanism and causality in the microbiome. These efforts fall into two categories based  
38 on the nature of the transplanted community: studies involving transplantation of complete, undefined  
39 communities (i.e., fecal samples) have shown that the microbiome plays a role in a variety of host  
40 phenotypes including the response to cancer immunotherapy (Gopalakrishnan et al. 2018; Matson et al.  
41 2018; Routy et al. 2018), caloric harvest (Ridaura et al. 2013), colonization resistance to enteric pathogens  
42 (Buffie et al. 2015), and neural development (Sharon et al. 2019; Buffington et al. 2021). While illuminating,  
43 a limitation of this format is that it is difficult to ‘fractionate’ an undefined community, making it challenging  
44 to discover which strains are involved in a phenotype of interest.

45 As an alternative, germ-free mice have been colonized with communities that are incomplete but  
46 defined (i.e., a synthetic community). These studies have revealed mechanistic insights into immune  
47 modulation, glycan consumption, and other complex phenotypes driven by the microbiome (Wymore Brand  
48 et al. 2015; Patnode et al. 2019; Faith et al. 2014). Synthetic communities enable precise manipulations  
49 such as strain dropouts and gene knockouts. However, the communities used are typically of low  
50 complexity, limiting their ability to model the biology of a native-scale microbiome.

51 An ideal model system for the gut microbiome would capture the advantages of both approaches.  
52 To this end, we sought to create a community that is completely defined, enabling precise manipulations,  
53 but complex enough to exhibit emergent features of a complete community (e.g., stability upon  
54 transplantation, colonization resistance). We started by colonizing germ-free mice with a defined 104-  
55 member community (hCom1) designed in an accompanying effort (Cheng et al. 2021), showing that it  
56 adopts a stable, highly reproducible configuration in which its constituent strains span seven orders of  
57 magnitude of relative abundance. We augmented the community, filling open niches using an iterative  
58 ecology-based process, and we show that the enlarged community (hCom2) is more resilient to  
59 perturbation and resistant to pathogen colonization. Mice colonized by hCom2 are phenotypically similar  
60 to mice harboring an undefined human fecal sample, suggesting that our consortium and augmentation  
61 process lay the foundation for developing defined models of the human gut microbiome.

62

## 63 RESULTS

### 64 Attributes of a complex defined community in gnotobiotic mice

65 In accompanying work (Cheng et al. 2021), we designed a 104-member community (hCom1) that  
66 includes many of the most common bacterial taxa from the human gut microbiome. As a starting point for  
67 this study, we colonized germ-free Swiss-Webster (SW) mice with hCom1 (**Figure 1A**), which we prepared  
68 by propagating each strain individually and mixing OD-normalized cultures (**Methods**). We sampled fecal  
69 pellets from the mice weekly for eight weeks, enumerated community composition in the inoculum and

70 each fecal sample by metagenomic sequencing, and performed read analysis with a highly sensitive and  
71 specific read mapping pipeline, NinjaMap (Cheng et al. 2021). Taking advantage of the fact that each  
72 organism in hCom1 is sequenced, NinjaMap translates read-counting statistics into community  
73 composition information even for low-abundance organisms ( $<10^{-6}$ ). Our analysis yielded three main  
74 conclusions:

75 First, almost all strains in the inoculum colonize the mouse gut (**Figure 1B-C**). We confirmed the  
76 presence of 103/104 strains in the inoculum; of these, 101 strains were detected in the mice at least once.  
77 While strain relative abundances spanned  $>7$  orders of magnitude, nearly all strains exhibited low variation  
78 across 20 mice in four cages, with coefficient of variation (CV, standard deviation/mean)  $<0.4$ .

79 Second, the community quickly reaches a stable configuration (**Figure 1D**). Averaged across mice,  
80 relative abundances remained mostly constant starting two weeks after colonization, with Pearson's  
81 correlation coefficient  $>0.95$  at each time point with respect to the composition in week 8. After the first  
82 week, relative abundances stayed within a narrow range for the duration of the experiment (mean CV $<0.2$   
83 across the 96 strains that remained above the limit of detection). Large shifts in relative abundance were  
84 rare: only 27/312 (8.7%) week-to-week strain-level changes were  $>10$ -fold.

85 Third, the architecture of the community resembles that of a complete, undefined human fecal  
86 consortium (**Figure 1E**). We colonized germ-free mice with three human fecal samples (hereafter,  
87 'humanized') and compared their community compositions to those of mice colonized with hCom1. For this  
88 analysis we used MIDAS (Nayfach et al. 2016), an enumeration tool that—unlike NinjaMap—does not  
89 require prior knowledge of the constituent strains. MIDAS and NinjaMap reported highly concordant relative  
90 abundance profiles using sequencing reads from hCom1-colonized mice, although—as expected—MIDAS  
91 was less sensitive since it utilizes only 1% of sequencing reads (**Figure S1**). We used MIDAS for  
92 subsequent analyses of samples that are partially or completely undefined.

93 The gut communities of hCom1-colonized and humanized mice were similar in three ways: (i)  
94 Relative abundances spanned at least five orders of magnitude, with some strains consistently colonizing  
95 at  $>10\%$  and others at  $<0.001\%$ . (ii) The distribution of log relative abundances was centered at  $\sim 0.01\%$ ,  
96 indicating that the majority of strains in the community would be missed by enumeration tools that have a  
97 limit of detection of 0.1%. (iii) Phylum-level distributions are similar: the median relative abundance of  
98 Bacteroidetes was higher than that of the Firmicutes ( $2.4 \times 10^{-2}$  versus  $7.7 \times 10^{-4}$  in hCom1-colonized mice,  
99 with total abundances of 0.78 and 0.12 for Bacteroidetes and Firmicutes, respectively;  $8.1 \times 10^{-3}$  versus  
100  $2.7 \times 10^{-4}$  in a representative humanized mouse, with total abundances of 0.84 and 0.12). In both cases,  
101 Actinobacteria were present at low relative abundance ( $\sim 10^{-4}$ ). Thus, hCom1 takes on a similar architecture  
102 to a human fecal community in the mouse gut.

103

104 **An ecology-based process to fill open niches in the community**

105 Although hCom1 is complex and phylogenetically representative of the human gut microbiome, it  
106 is not as complex or phylogenetically rich as a human fecal community (**Figure 1E**); indeed, the criteria  
107 that dictated its membership were not designed to ensure completeness by any functional or ecological  
108 criteria (Cheng et al. 2021). To create a defined community that better approximates the gut microbiome,  
109 we sought to augment hCom1 by increasing the number of niches it fills in the gastrointestinal tract. We  
110 designed an experimental strategy to fill open niches using strains from a complete consortium (**Figure**  
111 **2A**). Taking advantage of colonization resistance (Buffie and Pamer 2013; Lawley and Walker 2013), an  
112 ecological phenomenon in which resident organisms exclude invading strains from occupied niches, we  
113 started by colonizing germ-free mice for four weeks with hCom1, presumably filling the metabolic and  
114 anatomical niches in which its strains reside. We then challenged the mice with one of three undefined  
115 fecal samples, reasoning that invading strains that would otherwise occupy a niche already filled by hCom1  
116 would be excluded, whereas invading strains whose niche was unfilled would be able to cohabit with  
117 hCom1. After four additional weeks, we used metagenomic sequencing to analyze community composition  
118 from fecal pellets.

119 To determine which strains from each fecal sample colonized in presence of hCom1, we analyzed  
120 the composition of fecal pellets collected in weeks 5-8 to assign species as 'input' (hCom1-derived) or  
121 'invader' (fecal sample-derived). Using MIDAS, we cannot determine whether a strain present both pre-  
122 and post-challenge was derived from hCom1 (i.e., the original strain colonized persistently) or the fecal  
123 sample (i.e., a new strain displaced the original strain). To gain further insight into strain displacement  
124 versus persistence, we recruited reads from samples taken four weeks post-challenge (week 8) to a  
125 database composed of the hCom1 genome sequences, using only reads that were 100% identical to one  
126 or more of the genomes. We focused our analysis on genomes with high depth of coverage ( $\geq 10X$ ). More  
127 than 60% of these strains were covered broadly ( $\geq 95\%$ ) by perfectly matching reads, indicating that most  
128 strains present pre- and post-challenge were either hCom1-derived or a closely related strain (**Figure S2**).

129 As expected, mice challenged by saline instead of a fecal sample showed no evidence of new  
130 species post-challenge (**Figure 2B**). To our surprise, in hCom1-colonized mice challenged by a fecal  
131 sample, an average of 89% of the genome copies from week 8 (and 58% of the MIDAS bins, a rough proxy  
132 for species) derived from hCom1 (**Figure 2B**). The remaining 11% of the genome copies (and 42% of the  
133 MIDAS bins) represent new species that joined hCom1 from one of the fecal samples. Despite the addition  
134 of new species, the architecture of the community remained intact (**Figure 2C**): the relative abundances  
135 of the hCom1-derived species present post-challenge were highly correlated with their pre-challenge levels  
136 (Pearson's  $r > 0.85$ ) (**Figure 2D**). Thus, hCom1 is broadly but not completely resilient to a human fecal  
137 challenge.

138  
139 **Designing and constructing an augmented community**

140 The observation that only a small fraction of the post-challenge community is composed of new  
141 strains led us to hypothesize that we could improve the colonization resistance of hCom1 by adding the  
142 invading strains, thereby improving its ability to fill niches in the gut. Twenty-five bacterial species entered  
143 hCom1 from  $\geq 2$  of the 3 fecal samples used as a challenge (**Table S1**); we focused on these species,  
144 reasoning that they were more likely to fill conserved niches in the community. We were able to obtain  
145 22/25 from culture collections and we included all of them in the new community. At the same time, we  
146 omitted seven species that either failed to colonize initially or were displaced in all three groups of mice  
147 (**Figure S3**), reasoning that they were incompatible with the rest of hCom1 or incapable of colonizing the  
148 mouse gut under the dietary conditions in which the experiment was performed. Thus, the new community  
149 (hCom2) contains 97 strains from hCom1 plus 22 new strains, for a total of 119 (**Figure 3B, Figure S3,**  
150 **Table S2**).

151 We constructed hCom2 by culturing each strain separately and then mixing cultures after  
152 normalization. We colonized four groups of germ-free SW mice with hCom2, collecting fecal pellets weekly.  
153 As before, we measured community composition by metagenomic sequencing with NinjaMap (**Figure 3A**).  
154 The gut communities of hCom2-colonized mice rapidly reached a stable configuration (Pearson's  $r$  with  
155 respect to week 8  $> 0.97$ ) (**Figure S4**). 100 of the 119 strains were above the limit of detection; hCom1-  
156 derived strains colonized at similar relative abundances in the context of the augmented community (with  
157 similarly low CVs across mice). The strains that were new to hCom2 exhibited a wide range of relative  
158 abundances; *Bacteroides rodentium* became the most abundant species, whereas the least abundant of  
159 the new species, *Blautia* sp. KLE 1732, had a mean abundance  $\sim 10^{-4}$  (**Figure 3B**). Moreover, the  
160 architecture of the community more closely resembled that of a human fecal consortium at both the phylum  
161 and strain level (**Figures 3D, S5**).

162

### 163 **The augmented community is more resilient to human fecal challenge**

164 Our goal in constructing hCom2 was to improve its completeness as assessed by its ability to  
165 occupy niches in the gut. To test whether hCom2 is more complete than hCom1, we challenged hCom2-  
166 colonized mice at the beginning of week 5 with the same fecal samples used to challenge hCom1, enabling  
167 us to compare results between the challenge experiments. Importantly, the 22 strains used to augment  
168 hCom1 were obtained from culture collections rather than the fecal samples themselves, reducing the  
169 likelihood that hCom2 and the fecal samples have overlapping membership at the strain level (Garud et  
170 al. 2019). Indeed, by recruiting sequencing reads to the genomes of the new organisms in hCom2, we  
171 found that 17/22 were covered broadly ( $\geq 95\%$ ) by perfectly matching reads, consistent with the view that  
172 they were derived from hCom2 and not the fecal challenge (**Figure S6**).

173 An average of 96% of the genome copies (and 81% of the MIDAS bins) from week 8 derived from  
174 the strains in hCom2, demonstrating that the colonization resistance of hCom2 is markedly improved over

175 hCom1 (**Figure 3E**). The remaining 4% of reads (and 19% of MIDAS bins) represent species that engrafted  
176 in spite of the presence of hCom2 (**Figures 3E, S7**). Strikingly, nearly all of the species that invaded hCom2  
177 also invaded hCom1; we were either unable to obtain an isolate for inclusion in hCom2 or the species  
178 invaded hCom1 from only 1 of the 3 fecal samples used as a challenge, falling below our threshold for  
179 inclusion. These species represented virtually all of the remaining genome copies. We conclude that more  
180 extensive augmentation—based on the results of the first challenge experiment—would likely have  
181 enhanced colonization resistance beyond 99%.

182 Moreover, compared to hCom1, the composition of hCom2 post-challenge was more similar to its  
183 pre-challenge state (Pearson's  $r$  relative to week 4  $>0.95$ , **Figure 3F-G**). Taken together, these data show  
184 that hCom2 is more stable and complete than hCom1, and that the backfill process is robust and fault-  
185 tolerant in identifying species that can occupy unfilled niches.

186

### 187 **Reproducibility of colonization**

188 Our original goal in building a complex defined community was to develop a model system for the  
189 gut microbiome. Having demonstrated that hCom2 is stable and resilient to invasion, we sought to assess  
190 whether it has the attributes of a model system.

191 A threshold requirement is a substantial degree of reproducibility. We started by analyzing data  
192 from the second fecal challenge experiment in order to assess the technical reproducibility of community  
193 composition in mice colonized by hCom2. At week 4, strain abundances in 20 mice across 4 cages  
194 colonized by the same hCom2 inoculum were highly similar (pairwise Pearson's correlation coefficients  
195  $0.96\pm 0.01$ , **Figure S8**).

196 Biological reproducibility was a greater concern. Given the complexity of hCom1 and hCom2,  
197 variability in the growth of individual strains could lead to substantial differences in the composition of  
198 inocula constructed on different days. To determine the extent to which this variability affects community  
199 architecture *in vivo*, we compared community composition in four groups of mice colonized by replicates  
200 of hCom2 constructed independently on different days (**Figure 4A-B**). The communities displayed a  
201 striking degree of similarity in relative abundance profiles after 4 weeks (Pearson's correlation coefficient  
202  $>0.95$  between all pairs of biological replicates). We conclude that a relatively constant nutrient  
203 environment enables input communities with widely varying relative abundances to reach the same steady  
204 state configuration, consistent with ecological observations in other microbial communities (Hibberd et al.  
205 2017; Goldford et al. 2018; Aranda-Díaz et al. 2020; Venturelli et al. 2018). This high degree of biological  
206 reproducibility will be enabling for the use of complex defined communities as experimental models.

207 To further investigate the potential for hCom2 to function as a model microbiome, we assessed its  
208 composition in a second strain of mice. Since the experiments to develop hCom2 used outbred SW mice,  
209 we chose 129/SvEv, an inbred strain derived from the C57BL/6 background. We colonized germ-free

129/SvEv mice with hCom2 and collected fecal pellets after 4 weeks of colonization. Community composition was highly correlated with that of SW mice (Pearson correlation coefficient >0.95) (**Figure S8B**). These data indicate that hCom2, like the human gut microbiome (Rothschild et al. 2018), is robust to changes in host genotype.

214

### 215 **hCom2-colonized mice are phenotypically similar to humanized mice**

216 We performed three additional experiments to determine the degree to which hCom2-colonized  
217 mice resemble humanized mice. Since our defined communities are composed of human fecal isolates,  
218 we colonized germ-free mice with hCom2 or an undefined human fecal community and assayed  
219 phenotypes after 4 weeks (**Figure 4A**). First, fecal pellets from each mouse were serially diluted and plated  
220 on Columbia blood agar to estimate the bacterial cell density in each community. Each group contained  
221  $10^{11}$ - $10^{12}$  colony forming units per gram of feces (**Figure 4C**), similar to previously reported estimates from  
222 humans and from conventional and humanized mice (Vandeputte et al. 2017; Ley et al. 2006). Thus,  
223 hCom2 colonizes the mouse gut to a similar extent as a normal murine or human fecal community.

224 Next, we sought to determine whether mice colonized by hCom2 harbor a similar immune cell  
225 profile to that of humanized mice. We extracted and stained colonic immune cells and assayed them by  
226 flow cytometry. Most immune cell subtypes were similarly abundant in humanized and hCom2-colonized  
227 mice (**Figure 4D**), indicating that—at least in broad terms—hCom2-colonized mice are immunologically  
228 comparable to humanized mice.

229 Finally, to determine whether hCom2-colonized mice had a similar profile of microbiome-derived  
230 metabolites to humanized mice, we analyzed fecal pellets and urine samples using targeted metabolomics.  
231 Aromatic amino acid metabolite levels in urine (**Figure 4E**) and primary and secondary bile acid levels in  
232 feces (**Figure 4F**) were comparable between hCom2-colonized and humanized mice. Notably, hCom1-  
233 colonized mice exhibited lower levels of secondary bile acids than hCom2-colonized mice, indicating that  
234 some of the species used to augment hCom2 likely contribute to bile acid metabolism. Taken together,  
235 these data suggest that hCom2 is a reasonable model of gut microbial metabolism. A more thorough study  
236 would be needed to reveal finer-scale differences among mice humanized by distinct fecal samples.

237

### 238 **hCom2 exhibits robust colonization resistance against pathogenic *Escherichia coli***

239 To demonstrate the utility of hCom2 as a model system, we used it to study an emergent property  
240 of gut communities: their ability to resist colonization by pathogens and pathobionts (Buffie et al. 2015). To  
241 test whether hCom2 has this property, we studied invasion by enterohemorrhagic *Escherichia coli* (EHEC).  
242 We chose this strain for three reasons. First, EHEC is responsible for life-threatening diarrheal infections  
243 and hemolytic uremic syndrome, and enteric colonization by other *E. coli* strains has been linked to  
244 malnutrition and inflammatory bowel disease (Palmela et al. 2018; Pham et al. 2019). Second, colonization



245 resistance to *E. coli* and other Enterobacteriaceae has been studied in detail (Stromberg et al. 2018;  
246 Velazquez et al. 2019; Litvak et al. 2019), but the commensal strains responsible and mechanisms by  
247 which they act are incompletely understood. Finally, hCom2 harbors no Enterobacteriaceae and only two  
248 other (distantly related) strains of Proteobacteria, *Desulfovibrio piger* and *Bilophila wadsworthia*, so  
249 resistance to *E. coli* colonization would require a mechanism other than exclusion by a close relative  
250 occupying the same niche.

251 To test whether hCom2 is capable of resisting EHEC engraftment, we colonized germ-free SW  
252 mice with hCom2 or one of two other communities: a 12-member community (12Com) similar to one used  
253 in previous studies (McNulty et al. 2013) or an undefined stool sample from a healthy human donor (**Figure**  
254 **5A**). hCom2 and 12Com do not contain any Enterobacteriaceae; to test whether non-pathogenic  
255 Enterobacteriaceae enhance colonization resistance to EHEC, we colonized two additional groups of mice  
256 with variants of hCom2 and 12Com to which a mixture of seven non-pathogenic Enterobacteriaceae strains  
257 were added (six *E. coli* and *Enterobacter cloacae*). After four weeks, we challenged with EHEC and  
258 assessed invasion by selective plating under aerobic growth conditions (**Figure 5A**).

259 Consistent with previous reports (Mohawk and O'Brien 2011; Stromberg et al. 2018), the undefined  
260 human fecal sample conferred robust resistance against EHEC colonization (**Figure 5A**). In contrast,  
261 12Com allowed much higher levels of EHEC growth; the addition of non-pathogenic Enterobacteriaceae  
262 improved the phenotype but did not restore full EHEC resistance (**Figure 5A,B**). Despite lacking  
263 Enterobacteriaceae, hCom2 exhibited a similar level of EHEC resistance to that of an undefined fecal  
264 community; the addition of non-pathogenic Enterobacteriaceae further improved this phenotype (**Figure**  
265 **5A**). Thus, hCom2 is sufficiently complete to exhibit comparable levels of colonization resistance to a native  
266 fecal community.

267

## 268 **DISCUSSION**

269 The process by which we augmented a defined community revealed two unexpected findings. First,  
270 a community composed of strains from >100 distinct donors can be stable *in vivo*. It remains to be seen  
271 whether there are appreciable differences in stability—or in fine-scale genomic and phenotypic  
272 adaptation—between communities composed of isolates from a single donor (in which strains have co-  
273 existed for years) versus multiple donors (in which strains have no prior history together).

274 Second, the process we introduce here for filling open niches is surprisingly robust and fault  
275 tolerant. Most notably, nearly all of the strains that invaded hCom2 upon fecal challenge had previously  
276 invaded hCom1, indicating that niche filling is deterministic. Importantly, the backfill process caused little  
277 perturbation to the structure of the existing community, suggesting that it will result in a progressive  
278 improvement of the community. While the backfill process can only fill niches that are conserved from mice

279 to humans, the observation that most of our human strains engrafted suggests that many niches are  
280 conserved.

281 If we broaden our strain inclusion criteria, there is a reasonable likelihood we could have achieved  
282 >99% colonization resistance after just one round of augmentation. To further enhance niche filling and  
283 stability, it would help to subject hCom2 to further rounds of backfill involving fecal samples from other  
284 donors, ideally in the presence of a varying diet. It might also be possible to improve niche occupancy,  
285 e.g., in the setting of intestinal inflammation by performing the backfill process in a murine model of  
286 inflammatory bowel disease.

287 There is a great need for a common model system for the gut microbiome that is completely defined  
288 and complex enough to capture much of the biology of a full-scale community. We show that hCom2 is a  
289 reasonable starting point for such a system: in spite of its complexity, it colonizes mice in a highly  
290 reproducible manner. Moreover, hCom2 faithfully models the carrying capacity, immune cell profile, and  
291 metabolic phenotypes of humanized mice. There remain some modest differences in metabolic and  
292 immune profiles, and the community is still missing certain taxa that will likely be important to add.  
293 Nonetheless, taken together, our findings suggest that hCom2 is a reasonable starting point for a model  
294 system of the gut microbiome.

295 One of the most interesting possibilities for such a system would be to enable reductionist  
296 experiments downstream of a community transplantation experiment (e.g., to identify strains responsible  
297 for a microbiome-linked phenotype). Although we did not identify the strains responsible for colonization  
298 resistance to EHEC, follow-up experiments in which one or several strains at a time are eliminated from  
299 the community could narrow this down from the phylum level to individual strains. Efforts to identify the  
300 strains responsible for other microbiome-linked phenotypes including response to cancer immunotherapy,  
301 caloric harvest, and neural development, would be of great interest.

302 Our study has two important limitations. Since we challenged hCom2 with the same fecal samples  
303 used to challenge hCom1, we do not yet know whether hCom2 is universally stable to challenge by any  
304 fecal sample. However, in light of the fact that fecal communities from healthy adults are typically  
305 functionally replete and ecologically stable, our data demonstrating resilience to challenge by three such  
306 samples is a foundational starting point for the development of a defined community that is stable to broad  
307 set of microbial and environmental perturbations.

308 Second, it is unclear how many more bacterial strains (or other components) may be necessary to  
309 model the full functional capacity of a native human microbiome. Prior estimates of the number of species  
310 in a typical human microbiome range from ~150-300 (Faith et al. 2013; Kraal et al. 2014; Qin et al. 2010);  
311 in addition, hCom2 does not contain any archaea, fungi, or viruses, which could be added to broaden its  
312 diversity. Nonetheless, the observation that a defined community of just 119 strains exhibits remarkable  
313 stability bodes well for future efforts. We estimate that hCom2 is within 2-fold of native-scale complexity,

314 so a full-scale system is experimentally feasible. As a starting point for efforts to build such a system,  
315 hCom2 will provide a standard for assessing the genomic and functional completeness of model  
316 communities, with the ultimate goal of modeling native-scale human microbiomes.

317

## 318 **STAR★METHODS**

319 Detailed methods are provided in the online version of this paper and include the following:

- 320 • KEY RESOURCES TABLE
- 321 • RESOURCE AVAILABILITY
  - 322 ○ Lead contact
  - 323 ○ Materials availability
  - 324 ○ Data and code availability
- 325 • EXPERIMENTAL MODEL AND SUBJECT DETAILS
  - 326 ○ Bacterial strains and culture conditions
  - 327 ○ Preparation of 12Com
  - 328 ○ Preparation of Enteromix
  - 329 ○ Collection and preservation of human stool
  - 330 ○ Preparation of human stool
- 331 • METHOD DETAILS
  - 332 ○ Metagenomic sequencing
  - 333 ○ Augmenting the NinjaMap database
  - 334 ○ Metagenomic read mapping
  - 335 ○ Backfill experiment
  - 336 ○ Reproducibility and colonization experiments
  - 337 ○ Bacterial load estimates
  - 338 ○ Immune profiling
  - 339 ○ Metabolomics
  - 340 ○ *E. coli* colonization resistance
- 341 • QUANTIFICATION AND STATISTICAL ANALYSIS

342

## 343 **STAR★METHODS**

### 344 **Lead contact**

345 Further information and requests for resources and reagents should be directed to and will be fulfilled by  
346 the lead contact, Michael Fischbach ([fischbach@fischbachgroup.org](mailto:fischbach@fischbachgroup.org)).

347

### 348 **Materials availability**

349 *C. sporogenes* strains are available on request. The strains used in this study are available from the  
350 sources listed in the Key Resource Table.

351

### 352 **Data and code availability**

353 Original metagenomic and whole-genome sequencing data generated for this study will be available at the  
354 time of publication. The analysis tool NinjaMap is available at <https://github.com/czbiohub/NinjaMap>.

355

## 356 **EXPERIMENTAL MODEL AND SUBJECT DETAILS**

### 357 **Bacterial strains and culture conditions**

358 Bacterial strains were selected based on HMP sequencing data (Kraal et al. 2014). We obtained  
359 all species from publicly available repositories; the origin of each strain is listed in the Key Resources  
360 Table. Strains were cultured anaerobically in a 10% CO<sub>2</sub>, 5% H<sub>2</sub>, and 85% N<sub>2</sub> atmosphere in autoclave-  
361 sterilized 2.2-mL 96-well deep well plates (Thomas Scientific, Cat. #1159Q92). To create frozen stocks in  
362 96-well format, strains were aliquoted 1:1 into sterile 50% glycerol, capped with a silicone fitted plate mat  
363 (Thomas Scientific, Cat. #SMX-DW96S20), and the edges were sealed with oxygen-impervious yellow  
364 vinyl tape (Coy Labs, Cat. #1600330w).

365

### 366 **Preparation of synthetic community**

367 For all germ-free mouse experiments, strains were cultured and pooled in the following manner:  
368 From frozen stocks in 96-well plates, 100 µL of each strain was used to inoculate 900 µL of autoclave-  
369 sterilized media of the appropriate type for each strain in 2.2-mL 96-well deep well plates. Strains were  
370 diluted 1:10 every 24 h for 2 days into fresh growth medium in 2.2-mL deep well plates, and then diluted  
371 1:10 into 4 mL of the appropriate medium in 5-mL 48-well deep well plates (Thomas Scientific, Cat.  
372 #1223T83). After 24 h, the optical density at 600 nm (OD<sub>600</sub>) of each well was measured. Based on  
373 measurements of absorbance at 600 nm and enumeration of colony forming units (CFUs), we found that  
374 an OD<sub>600</sub> of 1.3 corresponds to ~10<sup>9</sup> cells/mL for *E. coli*. Using this estimate, we pooled appropriate  
375 volumes of each culture corresponding to 2 mL at OD<sub>600</sub>=1.3, centrifuged for 5 min at 5000 x *g*, and  
376 resuspended the pellet into 2 mL of 20% glycerol that had been pre-reduced for at least 48 h. For each  
377 inoculum preparation cycle, a small number of strains (<20) typically did not reach OD<sub>600</sub>~1.3. For these  
378 strains, the entire 4 mL culture volume was used for pooling. Volumes were scaled up accordingly if more  
379 inoculum was required for an experiment. Following pooling and preparation, 1.2 mL of the synthetic  
380 community was aliquoted into 2 mL Corning cryovials (Corning, Cat. #430659), removed from the  
381 anaerobic chamber, and transported to the vivarium where each vial was uncapped and its contents orally  
382 gavaged into mice within 1 min of uncapping. Each mouse received 200 µL of the mixed community  
383 inoculum. For the initial backfill experiments, we used freshly prepared inoculum; for all subsequent

384 experiments, the inoculum was frozen in cryovials at -80 °C; on the day of the experiment, it was defrosted  
385 and administered by oral gavage. The target for the inoculation procedure was that each mouse receive  
386  $\sim 10^8$  cells of each bacterial strain in a 200  $\mu$ L volume, for a total of  $\sim 10^{10}$  bacterial cells since hCom1 and  
387 hCom2 harbor 104 and 119 strains, respectively.

388

### 389 **Preparation of 12Com**

390 Cultures of the 12 strains in 12Com (*Bacteroides thetaiotaomicron* VPI-5482, *Bacteroides caccae*  
391 ATCC 43185, *Bacteroides ovatus* ATCC 8483, *Bacteroides uniformis* ATCC 8492, *Bacteroides vulgatus*  
392 ATCC 8482, *Clostridium scindens* ATCC 35704, *Collinsella aerofaciens* ATCC 25986, *Dorea longicatena*  
393 DSM 13814, *Eggerthella lenta* DSM 2243, *Eubacterium rectale* ATCC 33656, *Parabacteroides distasonis*  
394 ATCC 8503, and *Ruminococcus torques* ATCC 27756) were prepared in their respective growth media  
395 and propagated anaerobically for 24 h to  $OD_{600} \sim 1.3$ . 2 mL of each strain was pooled, centrifuged for 5 min  
396 at 5000 x g, and the pellet was resuspended in 2 mL of 20% pre-reduced glycerol and frozen in 1 mL  
397 aliquots in 2 mL Corning cryovials.

398

### 399 **Preparation of Enteromix**

400 Six strains of non-pathogenic *Escherichia coli* (strains MITI 27, MITI 117, MITI 135, MITI 139, MITI  
401 255, MITI 284) and one strain of *Enterobacter cloacae* (MITI 173) were isolated from the stool of a healthy  
402 human donor by mass spectrometry-guided enrichment culture (Lagier et al. 2016). Strains were stored at  
403 -80 °C in 25% glycerol. To prepare cultures for mouse colonization, strains were grown overnight in BHI  
404 broth, diluted 1:10 into 5 mL BHI broth, and cultured to  $OD_{600} \sim 1.3$ . 2 mL of each strain were pooled,  
405 centrifuged for 5 min at 5000 x g, and the pellet was resuspended in 200  $\mu$ L of 20% pre-reduced glycerol.  
406 100  $\mu$ L of this mixture were added to a tube containing 1 mL of previously prepared hCom2 or 12Com  
407 inoculum to create hCom2+Enteromix or 12Com+Enteromix, respectively. Each mouse was orally  
408 gavaged with 220  $\mu$ L of the appropriate community. The estimated amount of each Enteromix strain  
409 administered to mice was  $10^9$  cells per 20  $\mu$ L dose.

410

### 411 **Collection and preservation of human stool**

412 For all experiments, human stool was preserved in the same manner for inoculation into germ-free  
413 or hCom1/2-colonized mice. Specifically, freshly voided human stool was collected in a sterile container  
414 and transported into the anaerobic chamber within 5-10 min. The stool was weighed, mixed 1:1 with an  
415 equivalent volume of pre-reduced PBS, and stored at -80 °C.

416

### 417 **Preparation of human stool**

418 For human fecal challenge experiments, a stool mixture was defrosted in the anaerobic chamber  
419 and diluted 1:100 into pre-reduced PBS. 1 mL was aliquoted into pre-reduced 2 mL Corning cryovials,  
420 removed from the anaerobic chamber, and transported to the vivarium, where each vial was uncapped  
421 and orally gavaged into mice within 1 min of uncapping. Each mouse received 200  $\mu$ L of the bacterial  
422 mixture. Stool contains  $\sim 10^{11}$  colony forming units per gram of feces (Vandeputte et al. 2017); based on  
423 the dilutions performed, we estimate that each mouse received  $10^8$ - $10^{10}$  bacterial cells in the fecal  
424 challenge.

425 For all non-challenge stool colonization experiments, the preserved stool mixture was defrosted in  
426 the anaerobic chamber and diluted 1:2 into pre-reduced PBS. 1 mL of the resulting mixture was aliquoted  
427 into pre-reduced 2 mL Corning cryovials, removed from the anaerobic chamber, and transported to the  
428 vivarium, where each vial was uncapped and orally gavaged into mice within 1 min of uncapping. Each  
429 mouse received 200  $\mu$ L of the bacterial mixture, equivalent to  $10^{10}$ - $10^{11}$  bacterial cells per mouse.

430

### 431 **Metagenomic sequencing**

432 The same experimental pipeline was used for sequencing bacterial isolates and microbial  
433 communities. Bacterial cells were pelleted by centrifugation in an anaerobic environment. Genomic DNA  
434 was extracted using the DNeasy PowerSoil HTP kit (Qiagen) and the quantity of extracted genomic DNA  
435 was measured in a 384-well format using the Quant-iT PicoGreen dsDNA Assay Kit (Thermo Fisher).  
436 Sequencing libraries were generated in a 384-well format using a custom, low-volume protocol based on  
437 the Nextera XT process (Illumina). Briefly, the DNA concentration from each sample was normalized to  
438 0.18 ng/ $\mu$ L using a Mantis liquid handler (Formulatrix). In cases where concentration was below 0.18 ng/ $\mu$ L,  
439 the sample was not diluted further. Tagmentation, neutralization, and PCR steps of the Nextera XT process  
440 were performed on the Mosquito HTS liquid handler (TTP Labtech), creating a final volume of 4  $\mu$ L per  
441 library. During the PCR amplification step, custom 12-bp dual unique indices were introduced to eliminate  
442 barcode switching, a phenomenon that occurs on Illumina sequencing platforms with patterned flow cells  
443 (Costello et al. 2018). Libraries were pooled at the desired relative molar ratios and cleaned up using  
444 Ampure XP beads (Beckman) to effect buffer removal and library size selection. The cleanup process was  
445 used to remove fragments shorter than 300 bp and longer than 1.5 kbp. Final library pools were quality  
446 checked for size distribution and concentration using the Fragment Analyzer (Agilent) and qPCR (BioRad).  
447 Sequencing reads were generated using the NovaSeq S4 flow cell or the NextSeq High Output kit, both in  
448 2x150 bp configuration. 5-10 million paired-end reads were targeted for bacterial isolates and 20-30 million  
449 paired end reads for bacterial communities.

450

### 451 **Augmenting the NinjaMap database**

452 We obtained the latest available RefSeq (O'Leary et al. 2016) assembly for each strain in our  
453 communities and assessed their quality based on contig statistics from Quast v. 5.0.2 (Gurevich et al.  
454 2013) and SeqKit v. 0.12.0 (Shen et al., 2016), and GTDB-tk v. 1.2.0 (Chaumeil et al. 2019) for taxonomic  
455 classification. A 'combination score' was calculated as a linear combination of the completeness and  
456 contamination scores (completeness $-5\times$ contamination) derived from the CheckM v. 1.1.2 lineage workflow  
457 (Parks et al. 2015); such a score has been used previously, along with the metrics described here  
458 ([https://gtdb.ecogenomic.org/faq#gtdb\\_selection\\_criteria](https://gtdb.ecogenomic.org/faq#gtdb_selection_criteria)), to include/exclude genomes in the GTDB  
459 release 89 database (Parks et al. 2020; Parks et al. 2018). Genomes that contained any number of Ns,  
460 contained over 100 contigs, contained GTDB lineage warnings or multiple matches, or had CheckM  
461 completeness <90, contamination >10, and combination score <90 were selected for resequencing and  
462 reassembly.

463 Our hybrid assembly pipeline contains a workflow for *de novo* or reference-guided genome  
464 assembly using Illumina short reads in combination with long reads from PacBio or Nanopore. The  
465 workflow has three main steps: read pre-processing, hybrid assembly, and contig post-processing. Read  
466 pre-processing included 1) quality trimming/filtering (bbduk.sh adapterFile="adapters.phix" k=23, hdist=1,  
467 qtrim=rl, ktrim=r, entropy=0.5, entropywindow=50, entropyk=5, trimq=25, minlen=50), with adapters and  
468 phix removed with kmer right-trimming, kmer size of 23, Hamming distance 1 (allowing one mismatch),  
469 quality trimming of both sides of the read, filtering of reads with average entropy <0.5 with entropy kmer  
470 length of 5 and a sliding window of 50, trimming to a Q25 quality score, and removal of reads with length  
471 <50 bp; 2) deduplication (bbdupe.sh); 3) coverage normalization (bbnorm.sh min=3) such that depth <3x  
472 was discarded; 4) error correction (tadpole.sh mode=correct); and 5) sampling (reformt.sh). All pre-  
473 processing was carried out using BBtools v. 38.37 for short reads. For long reads, we used fitlong v. 0.2.0  
474 (fitlong --min\_length 1000 --keep\_percent 90 --length\_weight 10) to discard any read <1 kb and the worst  
475 10% of read bases, as well as to weight read length as more important when choosing the best reads.  
476 Hybrid assembly was performed by Unicycler v. 0.4.8 (Wick et al. 2017) with default parameters using pre-  
477 processed reads. After assembly, the contigs from the assembler were scaffolded by LRScf v. 1.1.9 (Qin  
478 et al. 2018) with default parameters. If the initial assembly did not produce the complete genome, gaps  
479 were filled using long reads by TGS-GapCloser v. 1.0.1 (Xu et al. 2019) with default parameters.

480 If no long reads were available, short paired-end reads were *de novo*-assembled using SPAdes v.  
481 3.13.1 (Bankevich et al. 2012) with the --careful option to reduce the number of mismatches and short  
482 indels during assembly of small genomes. Assembly quality was assessed based on the CheckM v. 1.1.2  
483 lineage. If contamination was detected, the assembly was binned from the contaminated assembly using  
484 MetaBAT2 v. 2.2.14 (Kang et al. 2019) with default parameters.

485 Finally, assembled genomes were evaluated using the same criteria as the RefSeq assemblies,  
486 and the assembly for each species with better overall quality metrics was chosen as the reference

487 assembly. This procedure resulted in the replacement of 85 genomes: two obtained from a PacBio/Illumina  
488 hybrid assembly, 69 from a Nanopore/Illumina hybrid assembly, one from a reference-guided Illumina  
489 assembly, and seven from short-read assemblies of the respective isolate samples followed by binning  
490 (**Table S3**).

491

### 492 **Metagenomic read mapping**

493 Paired-end reads from each sample were aligned to the hCom1 or hCom2 database using Bowtie2  
494 with maximum insert length (-maxins) set to 3000, maximum alignments (-k) set to 300, suppressed  
495 unpaired alignments (--no-mixed), suppressed discordant alignments (--no-discordant), suppressed output  
496 for unaligned reads (--no-unal), required global alignment (--end-to-end), and using the "--very-sensitive"  
497 alignment preset (command: --very-sensitive -maxinsX 3000 -k 300 --no-mixed --no-discordant --end-to-  
498 end --no-unal). The output was piped into Samtools v. 1.9 (Li et al. 2009), which was used to convert the  
499 alignment output from SAM output stream to BAM format and then sort and index the BAM file by  
500 coordinates. Alignments were filtered to only keep those with >99% identity for the entire length of the  
501 read.

502 The median percentage of unaligned reads was 4.95% (range 4.10% - 8.35%). To assess the origin  
503 of these reads, we performed a BLAST v2.11.0+ search through the ncbi/blast:latest docker image with  
504 parameters "--outfmt '6 std qlen slen qcovs sscinames staxids' -dbsize 1000000, -num\_alignments 100"  
505 from a representative sample against the 'NCBI - nt' database as on 2021-02-16. We then filtered the  
506 BLAST results to obtain the top hits for a given query. Briefly, the script defined top hits as ones that had  
507 an e-value <= 1e-30, percent identity >= 99% and were within 10 percent of the best bit score for that  
508 query. To visualize and summarize the output, we used the ktlImportTaxonomy script from the Krona  
509 package with default parameters. Reads were aggregated by NCBI taxon id and separately by genus. We  
510 found that most of the hits are from taxa that are closely related to the organisms in our community, while  
511 others are from the mouse genome. We conclude that our experiments did not suffer from any appreciable  
512 level of contamination.

513

### 514 **Backfill experiment**

515 Individual strains were cultured in their respective media (**Table S2**), normalized, and pooled to  
516 form the synthetic community as described in 'Preparation of bacterial synthetic community.' Mice were  
517 orally gavaged with freshly prepared synthetic community three days in a row and were sampled weekly  
518 for 4 weeks. After 4 weeks, mice were orally gavaged with stool from one of three healthy human donors  
519 (one donor per 5 mice) or PBS as a control.

520

### 521 **Reproducibility and colonization experiments**



522 Groups of five 6-8-week-old female germ-free SW mice were colonized for 4 weeks with hCom1 or  
523 hCom2 and fecal pellets were sampled after 4 weeks. These fecal pellets were subjected to DNA  
524 extraction, metagenomic sequencing, and NinjaMap read mapping to estimate strain relative abundances.

525

### 526 **MIDAS analyses**

527 MIDAS was run using the database v. 1.2 with default parameters on each library. Results were  
528 aggregated and filtered to include only MIDAS species representatives (buckets) that were called based  
529 on  $\geq 2$  reads and reported a minimum of  $10^{-4}$  relative abundance. To determine which invading species to  
530 use in augmenting hCom1, a threshold relative abundance of  $10^{-4}$  was applied. A species was selected to  
531 augment hCom1 if it is present above the threshold in 2-3 of the 3 challenge groups.

532

### 533 **MIDAS sensitivity analysis**

534 To determine the sensitivity of MIDAS for analyses of strains in our communities, we generated  
535 error-free 150-bp paired-end reads *in silico* for each genome. Each simulated read set was individually  
536 processed by MIDAS. While most genomes were identified correctly and assigned to a single MIDAS  
537 bucket, 22 strains from hCom1 and hCom2 cross-mapped to multiple buckets. As expected, MIDAS was  
538 unable to separate closely related strains, with 14 MIDAS buckets from hCom1 and 17 from hCom2  
539 recruiting reads from more than one strain (**Table S4**).

540

### 541 **Analyzing strain displacement versus persistence**

542 To determine the coverage of genomes from hCom1 and hCom2 in week 8 samples after a fecal  
543 challenge, reads were aligned to two Bowtie2 databases, hCom1 (version SCv1.2) and hCom2 (version  
544 SCv2.3). Each alignment file was filtered to only include alignments with 99% or 100% identity at 100%  
545 alignment length. Alignments at 99% identity were performed to recruit reads from any strain that was very  
546 similar but not identical. The breadth of coverage—i.e., the percentage of the genome covered by at least  
547 1 read—and the depth of coverage (the average number of reads covering positions in the genome) was  
548 calculated for each organism in each sample at both identity thresholds.

549 Results from the MIDAS analysis of each sample were combined with MIDAS bucket strain  
550 contributions from the sensitivity analysis and strain coverage metrics. Most of the high abundance strains  
551 had high coverage depth and breadth of coverage at 99% and 100% identity, suggesting that the original  
552 strains (or highly similar variants) were present in the samples at week 8.

553

### 554 **Bacterial load estimates**

555 6-8-week-old female germ-free SW mice were colonized for 4 weeks with hCom1, hCom2, or one  
556 of two human stool samples, and fecal pellets were sampled after 4 weeks. Female germ-free and

557 conventional SW mice of the same age were sampled at the same time. Each colonization cohort contained  
558 5 mice. For each mouse, two fecal pellets were collected in a pre-weighed 1.5 mL Eppendorf tube  
559 containing 200  $\mu$ L of transport medium. After collection and weighing, the mass of the tube prior to  
560 sampling was subtracted to calculate stool weight. Samples were transferred into the anaerobic chamber  
561 and each pellet was crushed with a 1 mL pipette tip and vortexed at maximum speed for 30 s to create a  
562 homogenous mixture. This mixture was serially diluted 1:10 twelve successive times; each dilution was  
563 plated on pre-reduced Columbia blood agar plates and incubated at 37 °C. After 24 h, colonies were  
564 counted for each dilution. Fecal pellets were also subjected to DNA extraction, metagenomic sequencing,  
565 and NinjaMap analysis to estimate strain relative abundances.

566

### 567 **Immune profiling**

568 6-8-week-old female germ-free C57BL/6 mice were colonized for 2 weeks with hCom2, a human  
569 stool sample, or PBS as a negative control and fecal pellets were collected after 2 weeks. Mice were then  
570 sacrificed, colonic tissue was dissected, and immune cells were isolated using the Miltenyi Lamina Propria  
571 kit and Gentle MACS dissociator. Immune cells were stained using the antibodies listed in the Key  
572 Resource Table at 1:200 dilution and assessed using a LSRII flow cytometer. Fecal pellets were subjected  
573 to DNA extraction, metagenomic sequencing, and NinjaMap analysis to estimate strain relative  
574 abundances.

575

### 576 **Metabolomics**

577 Cohorts of 6-8-week-old female germ-free SW mice were colonized for 4 weeks with hCom1,  
578 hCom2, or one of two human stool samples; urine and fecal pellets were sampled after 4 weeks. Female  
579 germ-free and conventional SW mice of the same age were sampled at the same time. Fecal pellets were  
580 subjected to DNA extraction, metagenomic sequencing, and NinjaMap analysis to estimate strain relative  
581 abundances.

582

### 583 **Sample preparation for LC/MS analysis**

584 For urine samples, 5  $\mu$ L of urine was diluted 1:10 with ddH<sub>2</sub>O and mixed with 50  $\mu$ L of internal  
585 standard water solution (20  $\mu$ M 4-chloro-L-phenylalanine and 2  $\mu$ M d<sup>4</sup>-cholic acid). After centrifugation for  
586 15 min at 4 °C and 18,000 x g, 50  $\mu$ L of the resulting mixture were used for quantification of creatinine  
587 using a Creatinine Assay Kit (ab204537, Abcam) as described in the manufacturer's protocol. The  
588 remaining 50  $\mu$ L was filtered through a Durapore PVDF 0.22- $\mu$ m membrane using Ultrafree centrifugal  
589 filters (Millipore, UFC30GV00), and 5  $\mu$ L was injected into the LC/MS.

590 For fecal pellets, ~40 mg wet feces was pre-weighed into a 2 mL screw top tube containing six 6-  
591 mm ceramic beads (Precellys® CK28 Lysing Kit). 600  $\mu$ L of a mixture of ice-cold acetonitrile, methanol,

592 and water (4/4/2, v/v/v) were added to each tube and samples were homogenized by vigorous shaking  
593 using a QIAGEN Tissue Lyser II at 25/s for 10 min. The resulting homogenates were subjected to  
594 centrifugation for 15 min at 4 °C and 18,000 x *g*. 100 µL of the supernatant was combined with 100 µL of  
595 internal standard water solution (20 µM 4-chloro-L-phenylalanine and 2 µM d<sup>4</sup>-cholic acid). The resulting  
596 mixtures were filtered through a Durapore PVDF 0.22-µm membrane using Ultrafree centrifugal filters  
597 (Millipore, UFC30GV00), or a MultiScreen Solvinert 96 Well Filter Plate (Millipore, MSRLN0410), and 5 µL  
598 was injected into the LC/MS.

599

### 600 **Liquid chromatography/mass spectrometry (LC/MS)**

601 For aromatic amino acid metabolites, analytes were separated using an Agilent 1290 Infinity II  
602 UPLC equipped with an ACQUITY UPLC BEH C18 column (1.7 µm, 2.1 mm x 150 mm, Waters Cat.  
603 #186002352 and #186003975) and detected using an Agilent 6530 Q-TOF equipped with a standard  
604 atmospheric-pressure chemical ionization (APCI) source or dual Agilent jet stream electrospray ionization  
605 (AJS-ESI) source operating under extended dynamic range (EDR 1700 *m/z*) in negative ionization mode.  
606 For the APCI source, the parameters were as follows: gas temperature, 350 °C; vaporizer, 350 °C; drying  
607 gas, 6.0 L/min; nebulizer, 60 psig; VCap, 3500 V; corona, 20 µA; and fragmentor, 135 V. For the AJS-ESI  
608 source, the parameters were as follows: gas temperature, 350 °C; drying gas, 10.0 L/min; nebulizer, 40  
609 psig; sheath gas temperature, 300 °C; sheath gas flow, 11.0 L/min; VCap, 3500 V; nozzle voltage, 1400  
610 V; and fragmentor, 130 V. Mobile phase A was H<sub>2</sub>O with 6.5 mM ammonium bicarbonate, and B was 95%  
611 MeOH with 6.5 mM ammonium bicarbonate. 5 µL of each sample was injected via autosampler into the  
612 mobile phase, and chromatographic separation was achieved at a flow rate of 0.35 mL/min with a 10 min  
613 gradient condition (*t*=0 min, 0.5% B; *t*=4 min, 70% B; *t*=4.5 min, 98% B; *t*=5.4 min, 98% B; *t*=5.6 min, 0.5%  
614 B).

615 For bile acids, compounds were separated using an Agilent 1290 Infinity II UPLC equipped with a  
616 Kinetex C18 column (1.7 µm, 2.1 x 100 mm, Phenomenex, Cat. #00D-4475-AN) and detected using an  
617 Agilent 6530 Q-TOF equipped with a dual Agilent jet stream electrospray ionization (AJS-ESI) source  
618 operating under extended dynamic range (EDR 1700 *m/z*) in negative ionization mode. The parameters of  
619 AJS-ESI source were as follows: gas temperature, 300 °C; drying gas, 7.0 L/min; nebulizer, 40 psig; sheath  
620 gas temp, 350 °C; sheath gas flow, 10.0 L/min; VCap, 3500 V; nozzle voltage, 1400 V; and fragmentor,  
621 200 V. Mobile phase A was H<sub>2</sub>O with 0.05% formic acid, and B was acetone with 0.05% formic acid. 5 µL  
622 of each sample was injected via autosampler into the mobile phase and chromatographic separation was  
623 achieved at a flow rate of 0.35 mL/min with a 32 min gradient condition (*t*=0 min, 25% B; *t*=1 min, 25% B;  
624 *t*=25 min, 75% B, *t*=26 min, 100% B, *t*=30 min, 100% B, *t*=32 min, 25% B).

625 Online mass calibration was performed using a second ionization source and a constant flow (5  
626 µL/min) of reference solution (119.0363 and 966.0007 *m/z*). The MassHunter Quantitative Analysis

627 Software (Agilent, v. B.09.00) was used for peak integration based on retention time (tolerance of 0.2 min)  
628 and accurate  $m/z$  (tolerance of 30 ppm) of chemical standards. Quantification was based on 2-fold dilution  
629 series of chemical standards spanning 0.05 to 100  $\mu\text{M}$  (aromatic amino acid metabolites) or 0.001 to 100  
630  $\mu\text{M}$  (bile acids) and measured amounts were normalized by weights of extracted tissue samples (pmol/mg  
631 wet tissue) or creatinine level in the urine sample ( $\mu\text{M}/\text{mM}$  creatinine). The linear quantification range and  
632 lower limit of detection for all metabolites are in **Table S5**. The MassHunter Qualitative Analysis Software  
633 (Agilent, version 7.0) was used for targeted feature extraction, allowing mass tolerances of 30 ppm.

634

### 635 ***E. coli* colonization resistance**

636 6-8-week-old female germ-free SW mice were orally gavaged with 200  $\mu\text{L}$  of hCom1, hCom2, a  
637 stool sample from a healthy human donor, or 12Com—or with 220  $\mu\text{L}$  of hCom2+Enteromix or  
638 12Com+Enteromix—and fecal pellets were sampled weekly for 4 weeks. After 4 weeks, mice were orally  
639 gavaged with a 200  $\mu\text{L}$  mixture containing  $10^9$  CFUs of EHEC and fecal pellets were sampled on days 0  
640 (pre-EHEC infection), 2, 4, 6, and 14. After collection, all stool was prepared aerobically. Specifically, stool  
641 pellets were weighed and 10x w/v PBS was added to the tube. Each pellet was crushed with a 1 mL pipette  
642 tip and vortexed at maximum speed for 30 s to create a homogenous mixture. This mixture was serially  
643 diluted 1:10 six successive times and 5  $\mu\text{L}$  of each dilution was plated on McConkey-Sorbitol agar. Plates  
644 were incubated at 37 °C for 16-18 h. The resulting colonies were enumerated and verified to be EHEC by  
645 metagenomic sequencing. Fecal pellets were also subjected to DNA extraction, metagenomic sequencing,  
646 and NinjaMap analysis to estimate strain relative abundances.

647

### 648 **QUANTIFICATION AND STATISTICAL ANALYSIS**

649 Relative abundances were calculated from the output of NinjaMap or MIDAS without rarefying the total  
650 number of reads across samples. Relative abundances at each time point were averaged across the 4-5  
651 mice that were co-housed in the same isolator and subjected to the same fecal challenge. Correlation  
652 coefficients were calculated after setting undetected bins to a minimum value ( $10^{-6}$  and  $10^{-8}$  for MIDAS and  
653 NinjaMap, respectively) and performing a  $\log_{10}$  transformation. Mice were not considered in the fecal  
654 challenge analyses if sequence reads in a sample from any week were of poor quality or abnormally  
655 variable. This affected one of five mice in all groups except for fecal challenge experiment 1, Hum3 (2 mice  
656 affected) and fecal challenge experiment 2, Hum1 (0 mice affected). Further details of statistical analyses  
657 can be found in the corresponding figure legends. All statistical analyses and tests were performed in  
658 MATLAB, and scripts for analyses are available at <https://github.com/FischbachLab>.

659

### 660 **ACKNOWLEDGMENTS**

661 We are deeply indebted to members of the Fischbach and Huang labs for helpful discussions. This work  
662 was supported by a Dean's Postdoctoral Fellowship (to P.-Y.H.), Human Frontier Science Program award  
663 LT000493/2018-L (K.N.), a Fellowship from the Astellas Foundation for Research on Metabolic Disorders  
664 (K.N.), the Stanford Microbiome Therapies Initiative (M.A.F., K.C.H.), NIH grants DP1 DK113598 (M.A.F.),  
665 P01 HL147823 (M.A.F.), R01 DK101674 (M.A.F.), RM1 GM135102 (K.C.H.), and R01 AI147023 (K.C.H.),  
666 the Bill and Melinda Gates Foundation (M.A.F.), an HHMI-Simons Faculty Scholars Award (M.A.F.), the  
667 Leducq Foundation (M.A.F.), the Stanford-Coulter Translational Research Grants Program (M.A.F.), the  
668 Chan Zuckerberg Biohub (K.C.H., M.A.F.), and the Allen Discovery Center at Stanford on Systems  
669 Modeling of Infection (K.C.H.).

670

#### 671 **AUTHOR CONTRIBUTIONS**

672 Conceptualization: A.C., M.A.F. Methodology and investigation: A.C., P.-Y.H., S.J., X.M., M.W., F.B.Y.,  
673 M.I., A.B., K.N., A.Z., A.P., K.A., A.W., R.Y., S.H., K.C.H., M.A.F. Formal analysis: A.C., P.-Y.H., S.J., X.M.,  
674 M.W., M.I., K.C.H., M.A.F. Visualization: A.C., P.-Y.H., S.J., K.C.H., M.A.F. Supervision: N.N., J.L.S.,  
675 K.C.H., M.A.F. Writing: A.C., P.-Y.H., S.J., K.C.H., M.A.F. All authors reviewed the manuscript before  
676 submission.

677

#### 678 **DECLARATION OF INTERESTS**

679 Stanford University and the Chan Zuckerberg Biohub have patents pending for microbiome technologies  
680 on which the authors are co-inventors. M.A.F. is a co-founder and director of Federation Bio and Viralogic,  
681 a co-founder of Revolution Medicines, and a member of the scientific advisory boards of NGM Bio and  
682 Zymergen. A.G.C. and K.N. have been paid consultants to Federation Bio. A.R.B. is an employee of  
683 Federation Bio. All of the other authors have no competing interests.

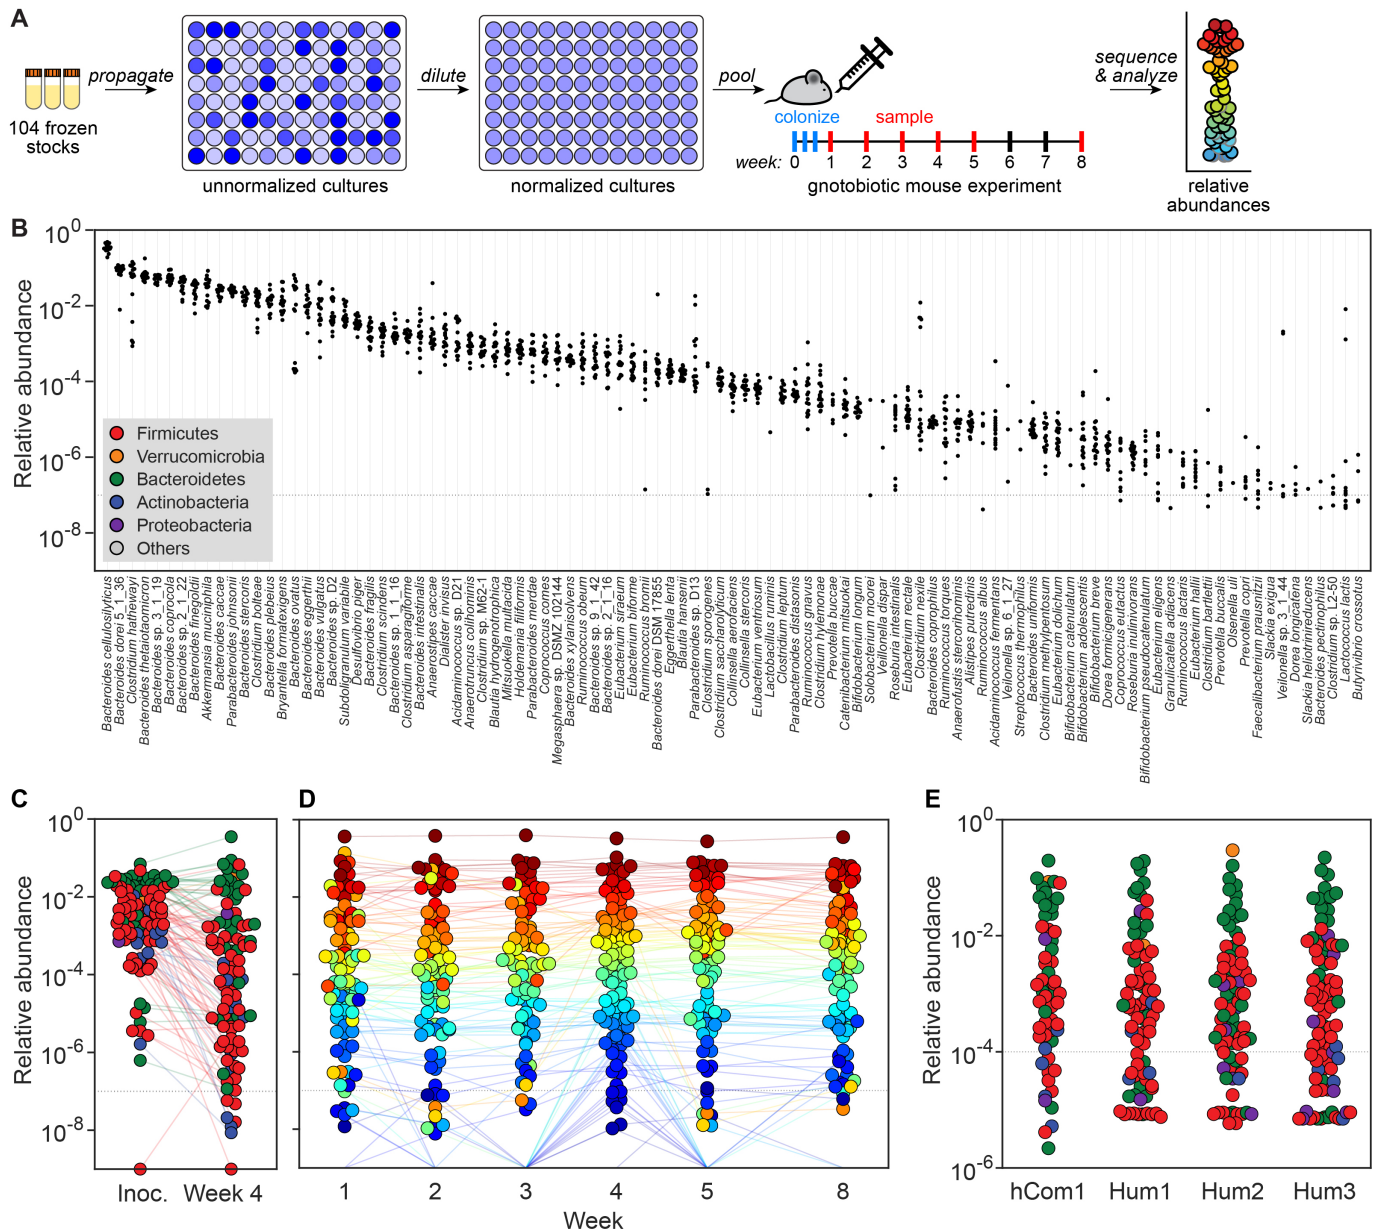

684 **Figure 1: Colonizing germ-free mice with a complex gut bacterial community.** (A) Schematic of the  
 685 experiment. Frozen stocks of the 104 strains were used to inoculate cultures that were grown for 24 h,  
 686 diluted to similar optical densities (to the extent possible), and pooled. The mixed culture was used to  
 687 colonize germ-free Swiss-Webster (SW) mice by oral gavage. Fecal samples were collected at weeks 1-5  
 688 and week 8, subjected to metagenomic sequencing, and analyzed by NinjaMap to measure the  
 689 composition of the community at each timepoint. (B) Relative abundances for most strains are tightly  
 690 distributed. Each column depicts the relative abundance of an individual strain across all samples at week  
 691 4. (C) Averaged relative abundances of the inoculum versus the communities at week 4. Strains in the  
 692 community span >6 orders of magnitude of relative abundance when colonizing the mouse gut. Dots are  
 693 colored by phylum according to the legend in panel B. (D) hCom1 reaches a stable configuration by week

694 2. Each dot is an individual strain; the collection of dots in a column represents the community at a single  
695 timepoint averaged over 5 mice co-housed in a cage. Strains are colored according to their rank-order  
696 relative abundance at week 4. **(E)** The architecture of the community resembles that of a complete,  
697 undefined human fecal consortium. Averaged relative abundances of MIDAS bins—a rough proxy for  
698 species—are shown for hCom1-colonized mice versus mice colonized by stool from one of three healthy  
699 human donors (Hum1-3). Dots are colored by phylum according to the legend in panel B. In each case,  
700 the distribution of log relative abundances was centered at ~0.01% and the median relative abundance of  
701 Bacteroidetes was higher than that of the Firmicutes.

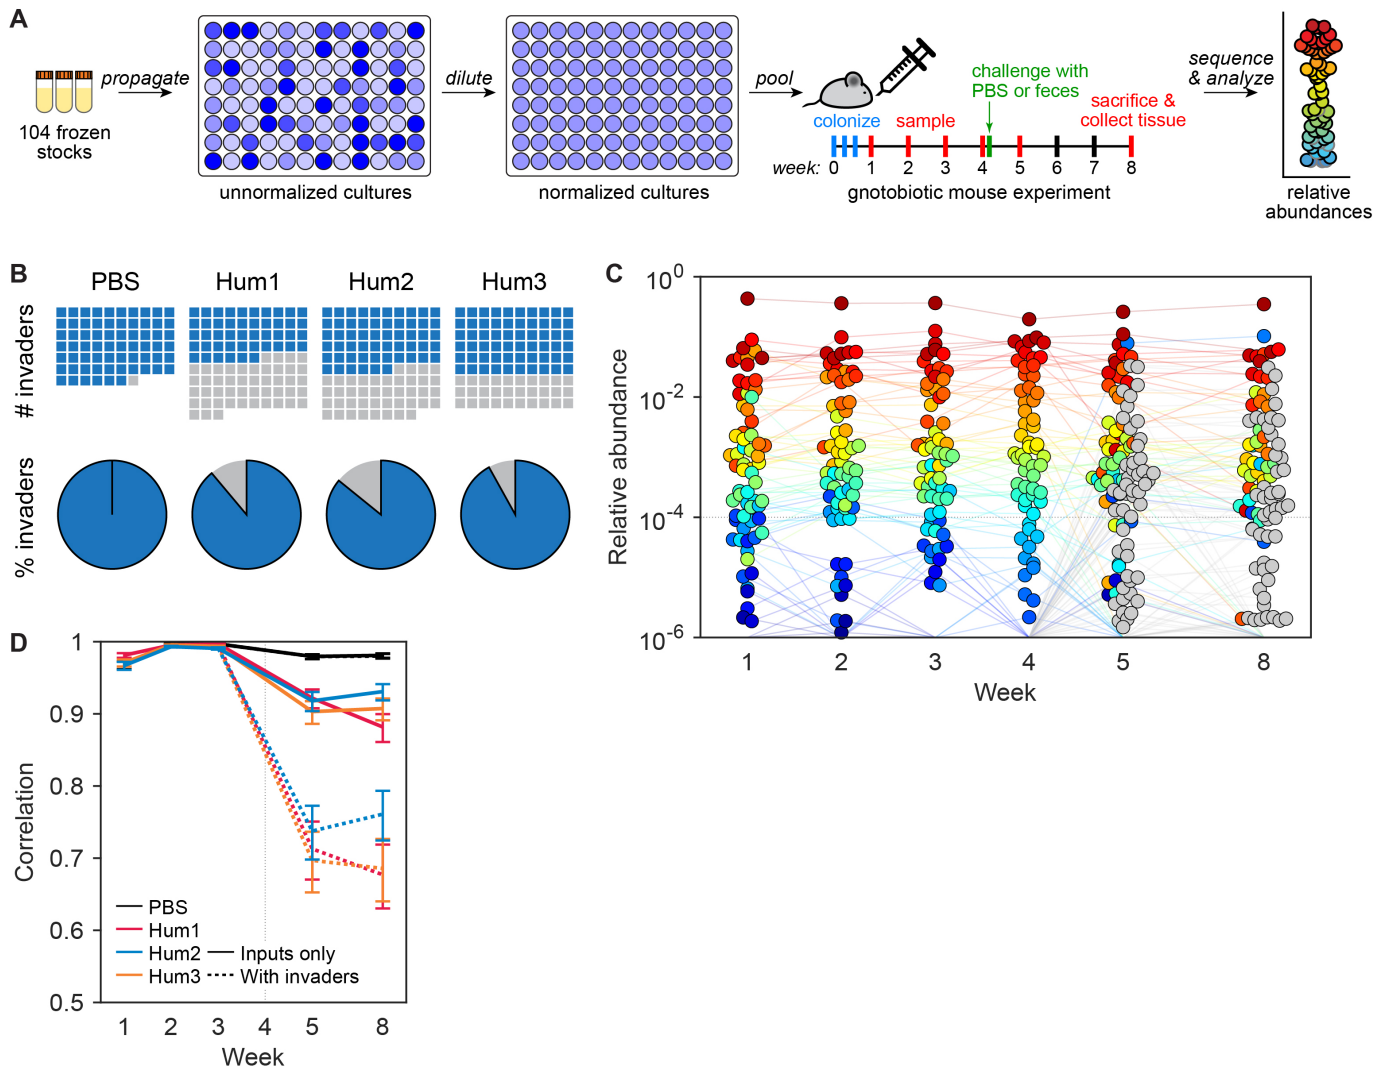

702 **Figure 2: Challenging hCom1 with human fecal communities to identify strains that fill open niches.**

703 (A) Schematic of the experiment. Mice were colonized by hCom1 and housed for four weeks, presumably  
 704 filling the metabolic and anatomical niches accessible to the strains in the community. At the beginning of  
 705 week 5, the mice were challenged with one of three fecal communities from a healthy human donor or with  
 706 PBS as a control; we reasoned that fecal strains that would otherwise occupy a niche already filled by  
 707 hCom1 would be excluded, whereas fecal strains whose niche was unfilled would be able to cohabit with  
 708 hCom1. After four additional weeks, we used metagenomic sequencing coupled with MIDAS to analyze  
 709 community composition from fecal pellets collected at weeks 1-5 and 8. (B) hCom1 was broadly but not  
 710 completely resistant to fecal challenge. Top row: Blue squares in the waffle plots indicate strains that derive  
 711 from hCom1, and gray squares represent strains from the fecal communities. Bottom row: pie charts  
 712 representing the percentage of MIDAS bins, a rough proxy for species-level taxa, that derive from hCom1  
 713 versus the fecal communities. An average of 89% of the genome copies from week 8—and 58% of the  
 714 MIDAS bins, a rough proxy for species—derived from hCom1. The remaining 11% of the genome copies,



715 and 42% of the MIDAS bins, represent new species that joined hCom1 from one of the fecal samples. **(C)**  
716 Despite the addition of new strains, the architecture of the community remained intact. Each dot is an  
717 individual strain; the collection of dots in a column represents the community at a single timepoint averaged  
718 over the 5 co-housed mice that were challenged with fecal community Hum1. Strains are colored according  
719 to their rank-order relative abundance at week 4. Gray circles represent invading species, defined as any  
720 species not present in weeks 1-4 in the group of mice shown. **(D)** The relative abundances of the hCom1-  
721 derived species present post-challenge were highly correlated with their pre-challenge levels. Pearson's  
722 correlation coefficient with respect to the average relative abundance in weeks 3 and 4 are shown for the  
723 PBS control and 3 fecal community challenges, averaged across mice that received the same challenge.  
724 Correlation coefficients are shown for the 104 hCom1 species (solid lines) and for all species including  
725 invaders (dashed lines).

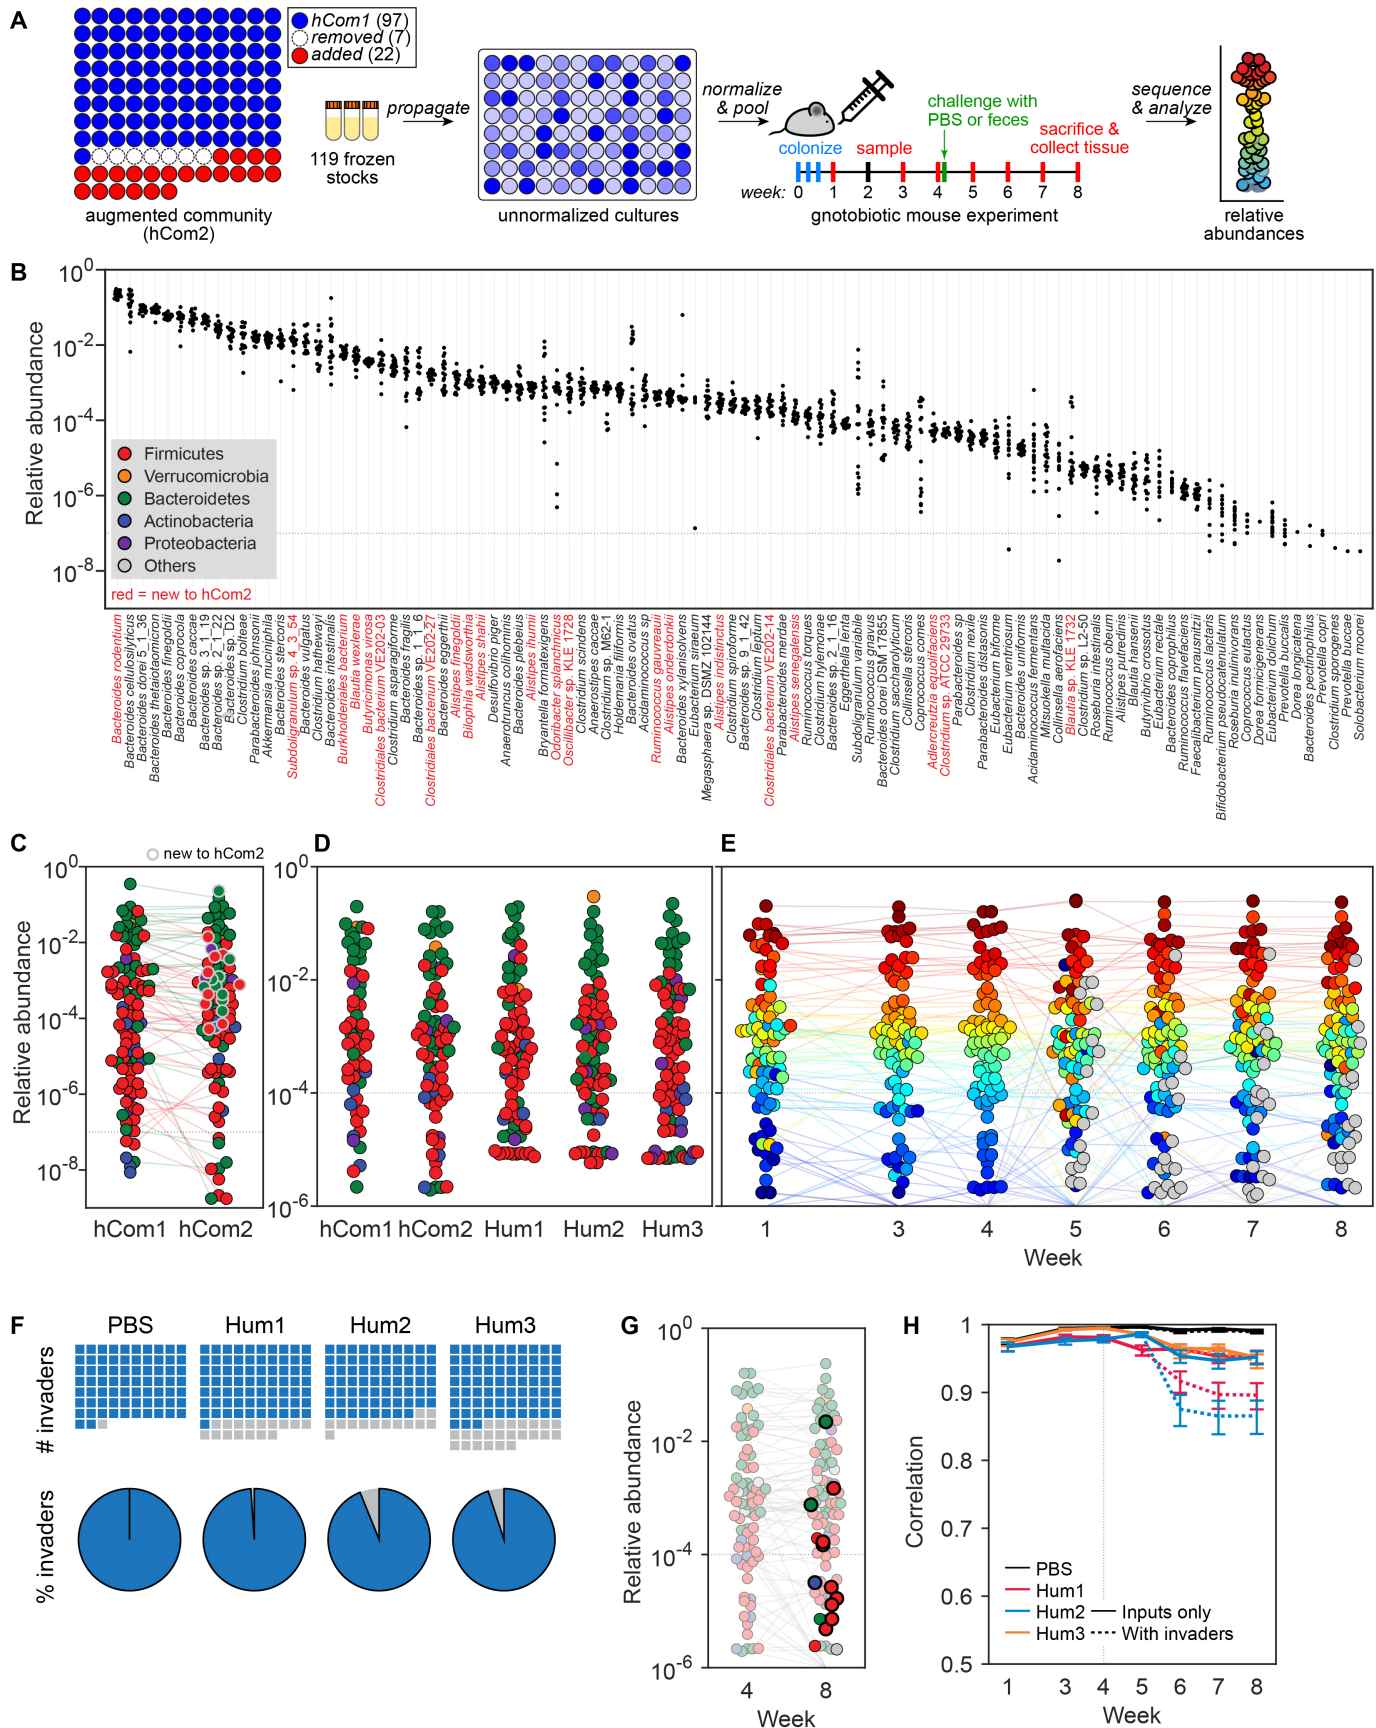

726 **Figure 3: An augmented community with improved resilience to fecal challenge. (A)** Schematic of  
727 the experiment. To augment the community, we added 22 strains that colonized in the presence of hCom1  
728 in  $\geq 2$  of the 3 fecal challenge conditions; we also removed seven species that were displaced in all three  
729 groups of mice. Thus, the new community (hCom2) contains 97 strains from hCom1 plus 22 new strains  
730 for a total of 119. Mice were colonized by hCom2 and housed for four weeks. At the beginning of week 5,  
731 they were challenged with the same fecal communities used in the first experiment, or with PBS as a  
732 control. After four additional weeks, we used metagenomic sequencing coupled with MIDAS to analyze  
733 community composition from fecal pellets collected at weeks 1 and 3-8. **(B)** Comparing the architecture  
734 and strain-level relative abundances of hCom1 and hCom2. Each column depicts the relative abundance  
735 of an individual strain from hCom2 across all samples at week 4. 100 of the 119 strains were detected;  
736 those that are new to hCom2 are colored red. **(C)** Averaged relative abundances of the strains in hCom1  
737 versus hCom2 at week 4. Strains that are new to hCom2 are indicated by a gray outline. Dots are colored  
738 by phylum according to the legend in panel B. **(D)** hCom2 resembles a fecal consortium more closely than  
739 hCom1. Averaged relative abundances of MIDAS bins—a rough proxy for species—are shown for hCom1-  
740 and hCom2-colonized mice versus mice colonized by stool from one of three healthy human donors  
741 (Hum1-3). The phylum-level architecture of hCom2 is more closely correlated to that of humanized mice  
742 than hCom1 (see **Figure S5**). **(E)** hCom2 is more resilient to fecal challenge than hCom1. Top row: Blue  
743 squares in the waffle plots indicate strains that derive from hCom2; gray squares represent strains from  
744 the fecal communities. Bottom row: pie charts representing the percentage of MIDAS bins that derive from  
745 hCom2 versus the fecal communities. An average of 96% of the genome copies (and 81% of the MIDAS  
746 bins) come from hCom2, demonstrating that the resilience of the community was improved markedly by  
747 augmentation with strains from the initial challenge. **(F)** The architecture of hCom2 is largely unaffected by  
748 fecal challenge. Each dot is an individual strain; the collection of dots in a column represents the community  
749 at a single timepoint averaged over the 5 co-housed mice that were challenged with fecal community  
750 Hum1. Strains are colored according to their rank-order relative abundance at week 4. Gray circles  
751 represent invading species, defined as any species not present in weeks 1-4 in the group of mice shown.  
752 **(G)** Nearly all of the invading strains were repeat invaders from the first fecal challenge. The dots  
753 representing invading strains are shown in full color; dots representing hCom2-derived strains are partially  
754 transparent. Dots that represent repeat invaders from the first fecal challenge experiment have a thick  
755 black border. **(H)** The relative abundances of the hCom2-derived species present post-challenge are highly  
756 correlated with their pre-challenge levels. Pearson's correlation coefficient with respect to the average  
757 relative abundance in weeks 3 and 4 are shown for the PBS control and 3 fecal community challenges,  
758 averaged across mice that received the same challenge. Correlation coefficients are shown for the 119  
759 species in hCom2 (solid lines) and for all species including invaders (dashed lines).

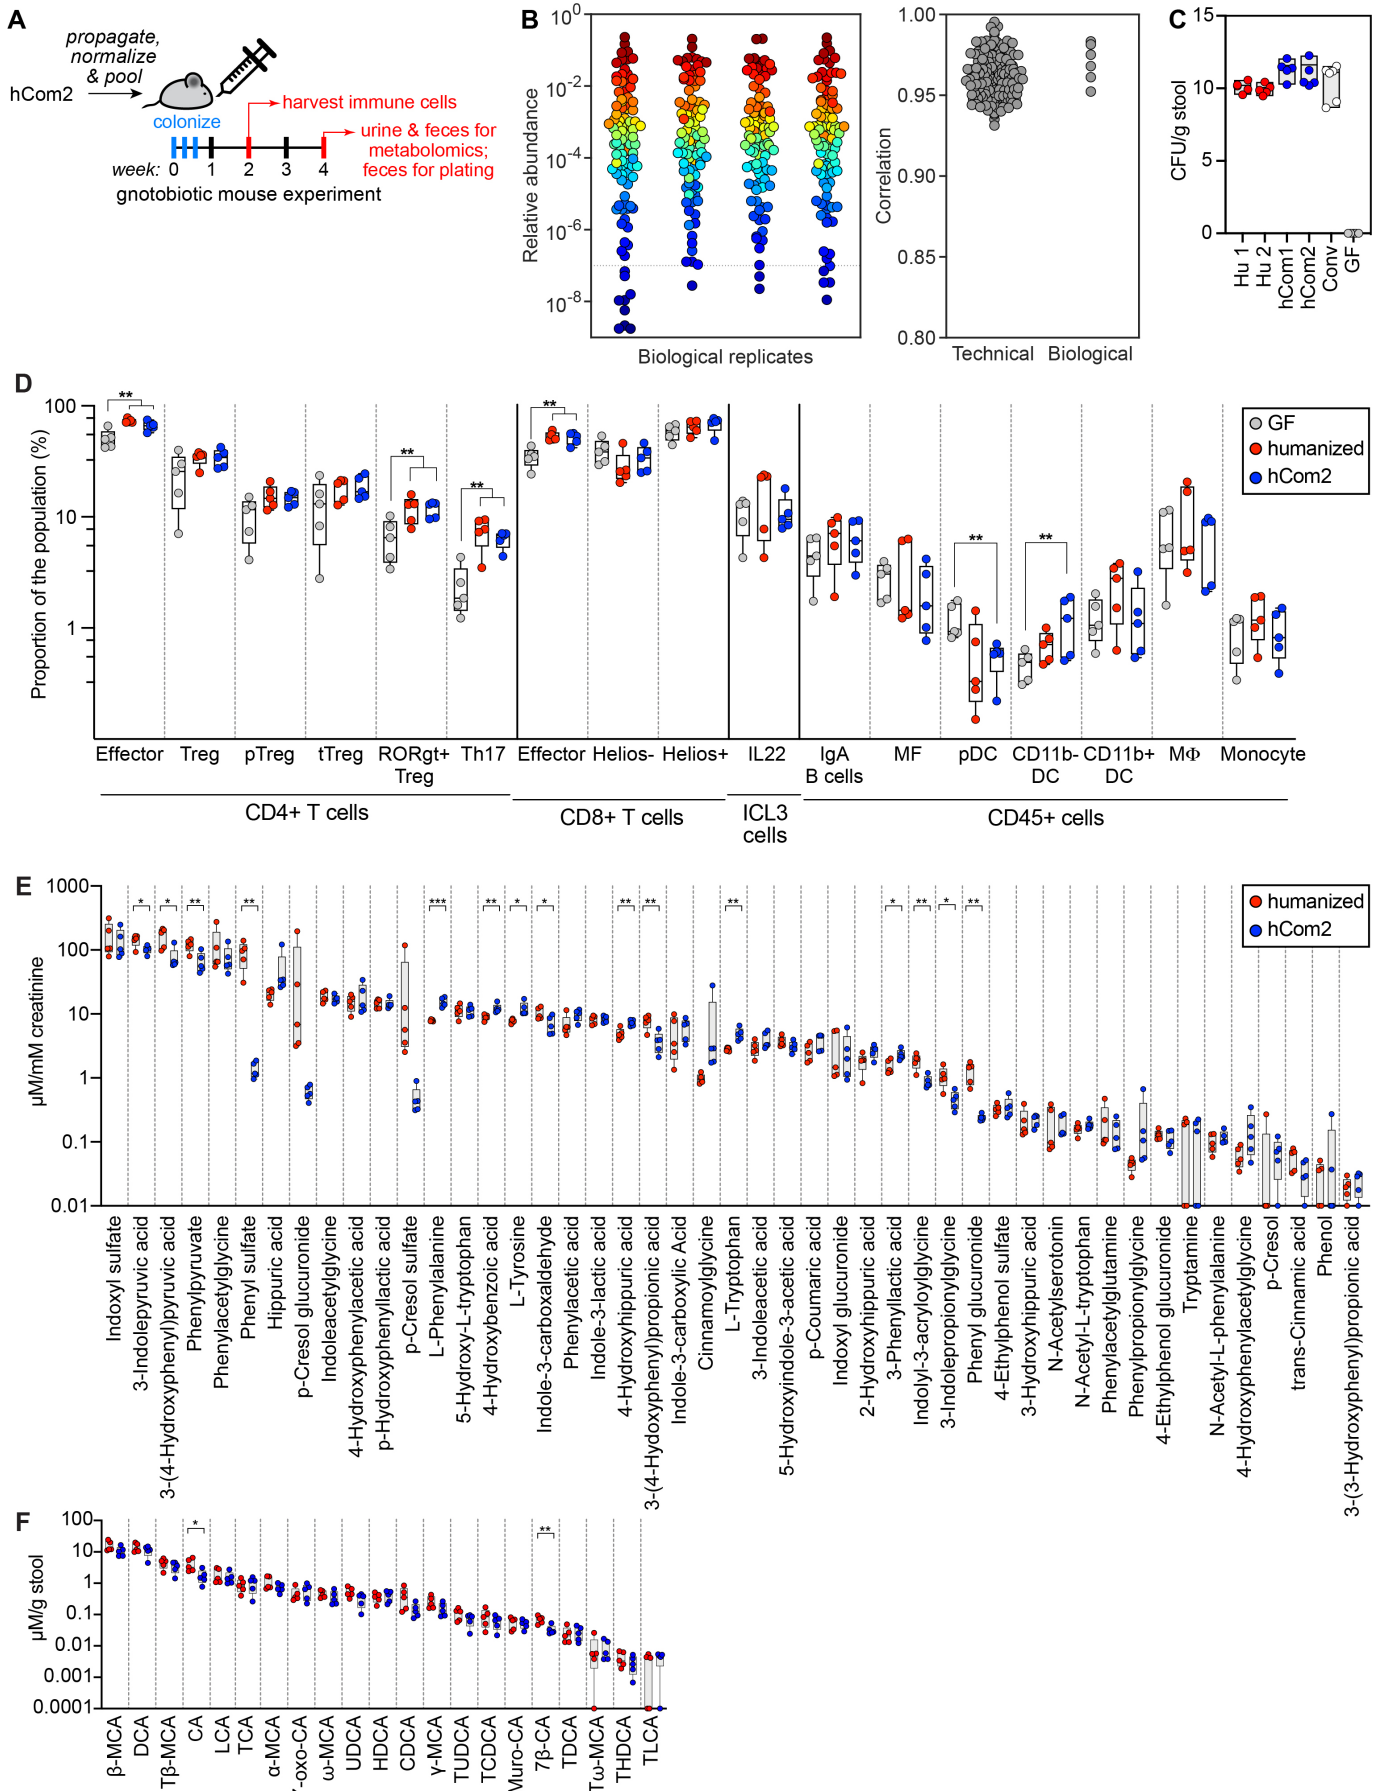

760 **Figure 4: hCom2-colonized mice are phenotypically similar to humanized mice.** (A) Schematic of the  
761 experiment. Germ-free SW mice were colonized with hCom2 or a fecal sample from a healthy human  
762 donor. One cohort of mice was sacrificed at two weeks for immune cell profiling; another was sacrificed at  
763 four weeks for targeted metabolite analysis. (B) The architecture of hCom2 in mice is highly reproducible.  
764 Left: community composition is highly similar across four biological replicates. Each dot is an individual  
765 strain; the collection of dots in a column represents the community at 4 weeks averaged over 5 mice co-  
766 housed in a cage. Strains are colored according to their average rank-order relative abundance across all  
767 samples. Right: Pearson's pairwise correlation coefficients for technical and biological replicates. (C)  
768 hCom2, hCom1, and humanized mice have similar bacterial cell densities *in vivo*. Fecal samples from  
769 hCom2-colonized, hCom1-colonized, humanized, specific pathogen-free (SPF), or germ-free (GF) mice  
770 were homogenized and plated anaerobically on Columbia Blood Agar to enumerate colony forming units.  
771 (D) Immune cell types and numbers were broadly similar between hCom2-colonized and humanized mice  
772 and distinct from germ-free mice. Colonic immune cells were extracted from hCom2-colonized, humanized,  
773 or germ-free mice (all C57BL/6), stained for cell surface markers, and assessed by flow cytometry.  
774 Statistical significance was assessed using a Student's two tailed t-test (\*\*:  $p < 0.05$ ). (E) hCom2-colonized  
775 mice and humanized mice have a similar profile of microbiome-derived metabolites. Urine samples from  
776 hCom2-colonized and humanized mice were analyzed by targeted metabolomics to measure a panel of  
777 aromatic amino acid metabolites by LC-MS. Statistical significance was assessed using a Student's two  
778 tailed t-test (\*:  $p < 0.05$ ; \*\*:  $p < 0.001$ ). (F) Bile acids were extracted from fecal pellets collected from hCom2-  
779 colonized and humanized mice and were quantified by LC-MS. Statistical significance was assessed using  
780 a Student's two tailed t-test (\*:  $p < 0.05$ ; \*\*:  $p < 0.001$ ).

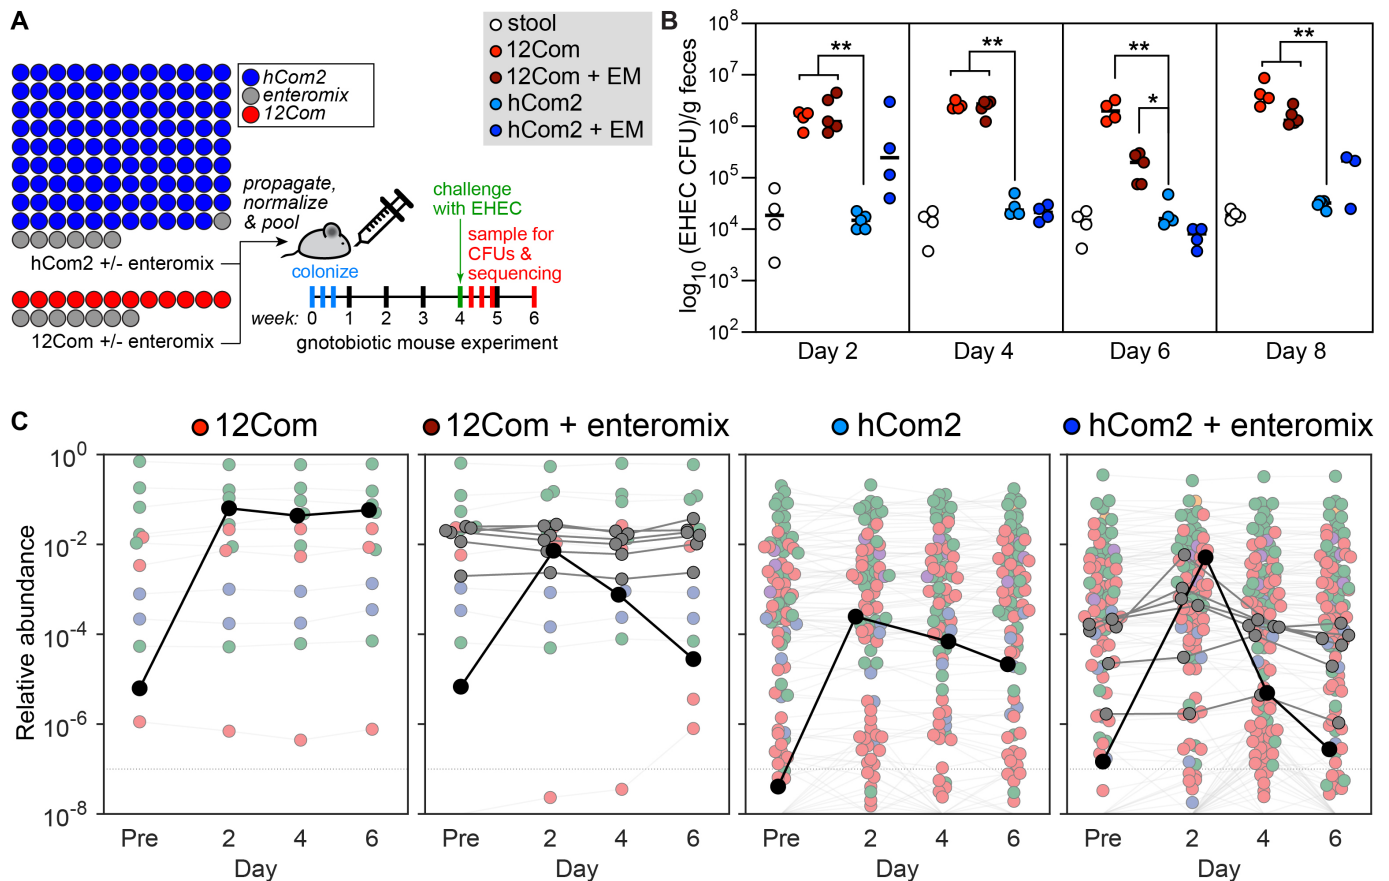

781 **Figure 5: hCom2 exhibits colonization resistance against enterohemorrhagic *E. coli*.** (A) Schematic  
 782 of the experiment. We colonized germ-free SW mice with hCom2 or one of two other communities: a 12-  
 783 member synthetic community (12Com) or a fecal community from a healthy human donor. hCom2 and  
 784 12Com do not contain any Enterobacteriaceae; to test whether non-pathogenic Enterobacteriaceae  
 785 enhance colonization resistance to EHEC, we colonized two additional groups of mice with variants of  
 786 hCom2 and 12Com to which a mixture of seven non-pathogenic Enterobacteriaceae strains were added  
 787 (six *E. coli* and *Enterobacter cloacae*, enteromix (EM)). After four weeks, we challenged with  $10^9$  colony  
 788 forming units of EHEC and assessed the degree to which it colonized in two ways: by EHEC-selective  
 789 plating under aerobic growth conditions, and by metagenomic sequencing with NinjaMap analysis. (B)  
 790 hCom2 exhibits a similar degree of EHEC resistance to that of a fecal community in mice. Colony forming  
 791 units of EHEC in mice colonized by the four different communities are shown. As expected, the fecal  
 792 community conferred robust colonization resistance while 12Com did not. Despite lacking  
 793 Enterobacteriaceae, hCom2 exhibited a similar level of EHEC resistance to that of an undefined fecal  
 794 community; the addition of non-pathogenic Enterobacteriaceae further improved this phenotype. (C)  
 795 The architecture of hCom2 is stable following EHEC challenge. Each dot is an individual strain; the collection  
 796 of dots in a column represents the community at a single timepoint averaged over four co-housed mice.

797 Strains are colored according to their phylum; EHEC is shown in black and members of the enteromix  
798 community are shown in gray.

799 **REFERENCES**

- 800 Aranda-Díaz, A., Ng, K.M., Thomsen, T., et al. 2020. High-throughput cultivation of stable, diverse, fecal-  
801 derived microbial communities to model the intestinal microbiota. *BioRxiv*.  
802
- 803 Bankevich, A., Nurk, S., Antipov, D., et al. 2012. SPAdes: a new genome assembly algorithm and its  
804 applications to single-cell sequencing. *Journal of Computational Biology* 19(5), pp. 455–477.  
805
- 806 Buffie, C.G., Bucci, V., Stein, R.R., et al. 2015. Precision microbiome reconstitution restores bile acid  
807 mediated resistance to *Clostridium difficile*. *Nature* 517(7533), pp. 205–208.  
808
- 809 Buffie, C.G. and Pamer, E.G. 2013. Microbiota-mediated colonization resistance against intestinal  
810 pathogens. *Nature Reviews. Immunology* 13(11), pp. 790–801.  
811
- 812 Buffington, S.A., Dooling, S.W., Sgritta, M., et al. 2021. Dissecting the contribution of host genetics and  
813 the microbiome in complex behaviors. *Cell*.  
814
- 815 Chaumeil, P.-A., Mussig, A.J., Hugenholtz, P. and Parks, D.H. 2019. GTDB-Tk: a toolkit to classify  
816 genomes with the Genome Taxonomy Database. *Bioinformatics*.  
817
- 818 Cheng, A., Aranda-Díaz, A., Jain, S., et al. 2021. Systematic dissection of a complex gut bacterial  
819 community. *bioRxiv*.  
820
- 821 Costello, M., Fleharty, M., Abreu, J., et al. 2018. Characterization and remediation of sample index  
822 swaps by non-redundant dual indexing on massively parallel sequencing platforms. *BMC Genomics*  
823 19(1), p. 332.  
824
- 825 Faith, J.J., Ahern, P.P., Ridaura, V.K., Cheng, J. and Gordon, J.I. 2014. Identifying gut microbe-host  
826 phenotype relationships using combinatorial communities in gnotobiotic mice. *Science Translational*  
827 *Medicine* 6(220), p. 220ra11.  
828
- 829 Faith, J.J., Guruge, J.L., Charbonneau, M., et al. 2013. The long-term stability of the human gut  
830 microbiota. *Science* 341(6141), p. 1237439.  
831
- 832 Galardini, M., Koumoutsis, A., Herrera-Dominguez, L., et al. 2017. Phenotype inference in an *Escherichia*  
833 *coli* strain panel. *eLife* 6.  
834
- 835 Garud, N.R., Good, B.H., Hallatschek, O. and Pollard, K.S. 2019. Evolutionary dynamics of bacteria in  
836 the gut microbiome within and across hosts. *PLoS Biology* 17(1), p. e3000102.  
837
- 838 Goldford, J.E., Lu, N., Bajić, D., et al. 2018. Emergent simplicity in microbial community assembly.  
839 *Science* 361(6401), pp. 469–474.  
840
- 841 Gopalakrishnan, V., Spencer, C.N., Nezi, L., et al. 2018. Gut microbiome modulates response to anti-PD-  
842 1 immunotherapy in melanoma patients. *Science* 359(6371), pp. 97–103.  
843
- 844 Gurevich, A., Saveliev, V., Vyahhi, N. and Tesler, G. 2013. QUAST: quality assessment tool for genome  
845 assemblies. *Bioinformatics* 29(8), pp. 1072–1075.  
846
- 847 Hibberd, M.C., Wu, M., Rodionov, D.A., et al. 2017. The effects of micronutrient deficiencies on bacterial  
848 species from the human gut microbiota. *Science Translational Medicine* 9(390).  
849
- 850 Kang, D.D., Li, F., Kirton, E., et al. 2019. MetaBAT 2: an adaptive binning algorithm for robust and  
851 efficient genome reconstruction from metagenome assemblies. *PeerJ* 7, p. e7359.



852  
853  
854  
855  
856  
857  
858  
859  
860  
861  
862  
863  
864  
865  
866  
867  
868  
869  
870  
871  
872  
873  
874  
875  
876  
877  
878  
879  
880  
881  
882  
883  
884  
885  
886  
887  
888  
889  
890  
891  
892  
893  
894  
895  
896  
897  
898  
899  
900  
901  
902  
903  
904

Kraal, L., Abubucker, S., Kota, K., Fischbach, M.A. and Mitreva, M. 2014. The prevalence of species and strains in the human microbiome: a resource for experimental efforts. *Plos One* 9(5), p. e97279.

Lagier, J.-C., Khelaifia, S., Alou, M.T., et al. 2016. Culture of previously uncultured members of the human gut microbiota by culturomics. *Nature Microbiology* 1, p. 16203.

Lawley, T.D. and Walker, A.W. 2013. Intestinal colonization resistance. *Immunology* 138(1), pp. 1–11.

Ley, R.E., Peterson, D.A. and Gordon, J.I. 2006. Ecological and evolutionary forces shaping microbial diversity in the human intestine. *Cell* 124(4), pp. 837–848.

Li, H., Handsaker, B., Wysoker, A., et al. 2009. The Sequence Alignment/Map format and SAMtools. *Bioinformatics* 25(16), pp. 2078–2079.

Litvak, Y., Mon, K.K.Z., Nguyen, H., et al. 2019. Commensal Enterobacteriaceae Protect against Salmonella Colonization through Oxygen Competition. *Cell Host & Microbe* 25(1), p. 128–139.e5.

Matson, V., Fessler, J., Bao, R., et al. 2018. The commensal microbiome is associated with anti-PD-1 efficacy in metastatic melanoma patients. *Science* 359(6371), pp. 104–108.

McNulty, N.P., Wu, M., Erickson, A.R., et al. 2013. Effects of diet on resource utilization by a model human gut microbiota containing *Bacteroides cellulosilyticus* WH2, a symbiont with an extensive glycome. *PLoS Biology* 11(8), p. e1001637.

Mohawk, K.L. and O'Brien, A.D. 2011. Mouse models of *Escherichia coli* O157:H7 infection and shiga toxin injection. *Journal of Biomedicine & Biotechnology* 2011, p. 258185.

Nayfach, S., Rodriguez-Mueller, B., Garud, N. and Pollard, K.S. 2016. An integrated metagenomics pipeline for strain profiling reveals novel patterns of bacterial transmission and biogeography. *Genome Research* 26(11), pp. 1612–1625.

O'Leary, N.A., Wright, M.W., Brister, J.R., et al. 2016. Reference sequence (RefSeq) database at NCBI: current status, taxonomic expansion, and functional annotation. *Nucleic Acids Research* 44(D1), pp. D733-45.

Palmela, C., Chevarin, C., Xu, Z., et al. 2018. Adherent-invasive *Escherichia coli* in inflammatory bowel disease. *Gut* 67(3), pp. 574–587.

Parks, D.H., Chuvochina, M., Chaumeil, P.-A., Rinke, C., Mussig, A.J. and Hugenholtz, P. 2020. A complete domain-to-species taxonomy for Bacteria and Archaea. *Nature Biotechnology* 38(9), pp. 1079–1086.

Parks, D.H., Chuvochina, M., Waite, D.W., et al. 2018. A standardized bacterial taxonomy based on genome phylogeny substantially revises the tree of life. *Nature Biotechnology* 36(10), pp. 996–1004.

Parks, D.H., Imelfort, M., Skennerton, C.T., Hugenholtz, P. and Tyson, G.W. 2015. CheckM: assessing the quality of microbial genomes recovered from isolates, single cells, and metagenomes. *Genome Research* 25(7), pp. 1043–1055.

Patnode, M.L., Beller, Z.W., Han, N.D., et al. 2019. Interspecies Competition Impacts Targeted Manipulation of Human Gut Bacteria by Fiber-Derived Glycans. *Cell* 179(1), p. 59–73.e13.

- 905 Pham, T.-P.-T., Tidjani Alou, M., Bachar, D., et al. 2019. Gut microbiota alteration is characterized by a  
906 proteobacteria and fusobacteria bloom in kwashiorkor and a bacteroidetes paucity in marasmus.  
907 *Scientific Reports* 9(1), p. 9084.  
908
- 909 Qin, J., Li, R., Raes, J., et al. 2010. A human gut microbial gene catalogue established by metagenomic  
910 sequencing. *Nature* 464(7285), pp. 59–65.  
911
- 912 Qin, M., Wu, S., Li, A., et al. 2018. Lrscf: improving draft genomes using long noisy reads. *BioRxiv*.  
913
- 914 Ridaura, V.K., Faith, J.J., Rey, F.E., et al. 2013. Gut microbiota from twins discordant for obesity  
915 modulate metabolism in mice. *Science* 341(6150), p. 1241214.  
916
- 917 Rothschild, D., Weissbrod, O., Barkan, E., et al. 2018. Environment dominates over host genetics in  
918 shaping human gut microbiota. *Nature* 555(7695), pp. 210–215.  
919
- 920 Routy, B., Le Chatelier, E., Derosa, L., et al. 2018. Gut microbiome influences efficacy of PD-1-based  
921 immunotherapy against epithelial tumors. *Science* 359(6371), pp. 91–97.  
922
- 923 Sharon, G., Cruz, N.J., Kang, D.-W., et al. 2019. Human Gut Microbiota from Autism Spectrum Disorder  
924 Promote Behavioral Symptoms in Mice. *Cell* 177(6), p. 1600–1618.e17.  
925
- 926 Stromberg, Z.R., Van Goor, A., Redweik, G.A.J., Brand, M.J.W., Wannemuehler, M.J. and Mellata, M.  
927 2018. Pathogenic and non-pathogenic *Escherichia coli* colonization and host inflammatory response in a  
928 defined microbiota mouse model. *Disease Models & Mechanisms* 11(11).  
929
- 930 Vandeputte, D., Kathagen, G., D'hoel, K., et al. 2017. Quantitative microbiome profiling links gut  
931 community variation to microbial load. *Nature* 551(7681), pp. 507–511.  
932
- 933 Velazquez, E.M., Nguyen, H., Heasley, K.T., et al. 2019. Endogenous Enterobacteriaceae underlie  
934 variation in susceptibility to *Salmonella* infection. *Nature Microbiology* 4(6), pp. 1057–1064.  
935
- 936 Venturelli, O.S., Carr, A.C., Fisher, G., et al. 2018. Deciphering microbial interactions in synthetic human  
937 gut microbiome communities. *Molecular Systems Biology* 14(6), p. e8157.  
938
- 939 Wick, R.R., Judd, L.M., Gorrie, C.L. and Holt, K.E. 2017. Unicycler: Resolving bacterial genome  
940 assemblies from short and long sequencing reads. *PLoS Computational Biology* 13(6), p. e1005595.  
941
- 942 Wymore Brand, M., Wannemuehler, M.J., Phillips, G.J., et al. 2015. The altered schaedler flora:  
943 continued applications of a defined murine microbial community. *ILAR journal / National Research*  
944 *Council, Institute of Laboratory Animal Resources* 56(2), pp. 169–178.  
945
- 946 Xu, M., Guo, L., Gu, S., et al. 2019. TGS-GapCloser: fast and accurately passing through the Bermuda in  
947 large genome using error-prone third-generation long reads. *BioRxiv*.  
948
